# Supplementary material for: Genome-Wide Association Study on Three Behaviors Tested in an Open Field in Heterogeneous Stock Rats Identifies Multiple Loci Implicated in Psychiatric Disorders
Source: PubMed Central journal article supplement (PMC8882588; doi:10.3389/fpsyt.2022.790566), 2022-02-14
Supplement: Data_Sheet_1.pdf [file Data_Sheet_1.pdf]

**Table S1.** Sex differences of OFT, NOIT and SIT (Mean  $\pm$  SD)

| Test | Trait                             | Female               | Male                 | p-value | Cohen's d |
|------|-----------------------------------|----------------------|----------------------|---------|-----------|
| OFT  | Duration in center zone           | 65 $\pm$ 51.4        | 55.7 $\pm$ 43.5      | 0.0006  | 0.19      |
|      | Frequency of entering center zone | 22.7 $\pm$ 14        | 19.9 $\pm$ 13.7      | 0.0003  | 0.21      |
|      | Latency of entering center zone   | 250.8 $\pm$ 301.3    | 271.6 $\pm$ 305.1    | 0.23    | 0.07      |
|      | Mean distance to center zone      | 36.3 $\pm$ 3.9       | 37.1 $\pm$ 3.9       | 0.0002  | 0.21      |
|      | Total distance to center zone     | 1930273 $\pm$ 224949 | 1976133 $\pm$ 229112 | 0.0004  | 0.20      |
|      | Total travel distance             | 16578 $\pm$ 4372     | 15762 $\pm$ 4272     | 0.0009  | 0.19      |
| NOIT | Duration in center zone           | 283.9 $\pm$ 151.7    | 268.1 $\pm$ 160.7    | 0.08    | 0.10      |
|      | Frequency of entering center zone | 40.4 $\pm$ 19.3      | 40.2 $\pm$ 20.6      | 0.92    | 0.01      |
|      | Latency of entering center zone   | 88.4 $\pm$ 123.8     | 108.3 $\pm$ 148      | 0.01    | 0.15      |
|      | Mean distance to center zone      | 24.6 $\pm$ 7.2       | 26.6 $\pm$ 7.3       | <0.0001 | 0.27      |
|      | Total distance to center zone     | 437507 $\pm$ 127709  | 473355 $\pm$ 130656  | <0.0001 | 0.28      |
|      | Total travel distance             | 8611 $\pm$ 2113      | 8217 $\pm$ 2226      | 0.001   | 0.18      |
| SIT  | Duration in object zone           | 141.2 $\pm$ 77.4     | 163.1 $\pm$ 86.9     | <0.0001 | 0.27      |
|      | Duration in social zone           | 454.3 $\pm$ 208.8    | 392.4 $\pm$ 187.5    | <0.0001 | 0.31      |
|      | Frequency of entering object zone | 44.9 $\pm$ 20.8      | 50 $\pm$ 25.1        | <0.0001 | 0.22      |
|      | Frequency of entering social zone | 85.2 $\pm$ 37.2      | 87 $\pm$ 32.7        | 0.35    | 0.05      |
|      | Latency of entering object zone   | 35.9 $\pm$ 51.2      | 37 $\pm$ 68.5        | 0.73    | 0.02      |
|      | Latency of entering social zone   | 5.2 $\pm$ 22.8       | 7.4 $\pm$ 45         | 0.28    | 0.06      |
|      | Mean distance to object zone      | 22.6 $\pm$ 6.7       | 23.6 $\pm$ 6.8       | 0.01    | 0.14      |
|      | Mean distance to social zone      | 12.3 $\pm$ 4.9       | 13.7 $\pm$ 4.5       | <0.0001 | 0.30      |
|      | Total distance to object zone     | 400955 $\pm$ 117623  | 420714 $\pm$ 121683  | 0.003   | 0.17      |
|      | Total distance to social zone     | 218013 $\pm$ 87249   | 244171 $\pm$ 80511   | <0.0001 | 0.31      |
|      | Total travel distance             | 9819 $\pm$ 2239      | 9841 $\pm$ 2312      | 0.86    | 0.01      |

**Table S2.** Strain distribution pattern of nearby QTL

| Top SNP        | AF    | SE    | Beta   | Allele1 | Allele2 | ACI | BN | BUF | F344 | M520 | MR | WN | WKY |
|----------------|-------|-------|--------|---------|---------|-----|----|-----|------|------|----|----|-----|
| chr4:150582701 | 0.362 | 0.042 | -0.203 | C       | A       | AA  | CC | AA  | AA   | AA   | AA | AA | AA  |
| chr4:151128675 | 0.512 | 0.040 | -0.192 | C       | A       | CC  | CC | CC  | CC   | CC   | CC | CC | AA  |
| chr6:119975012 | 0.696 | 0.048 | -0.229 | C       | T       | CC  | CC | CC  | CC   | TT   | CC | CC | CC  |
| chr6:120117521 | 0.312 | 0.046 | -0.216 | T       | G       | GG  | TT | 00  | GG   | TT   | GG | GG | GG  |
| chr19:20666789 | 0.946 | 0.088 | -0.458 | G       | C       | GG  | GG | GG  | GG   | CC   | GG | GG | CC  |
| chr19:20667417 | 0.946 | 0.088 | -0.452 | A       | G       | AA  | AA | AA  | AA   | AA   | AA | AA | GG  |

**Table S3.** Pleiotropic effects.

| Top SNP        | Trait                              | $-\log_{10}P$ |
|----------------|------------------------------------|---------------|
| chr1:144080083 | NOIT distance to center, total     | 5.969         |
|                | NOIT center duration               | 4.633         |
|                | NOIT distance to center, mean      | 5.143         |
| chr4:58009499  | OFT distance to center, total      | 7.254         |
|                | OFT distance to center, mean       | 7.469         |
|                | OFT total travel distance          | 4.191         |
| chr4:112234344 | NOIT center duration               | 6.028         |
|                | NOIT distance to center, mean      | 6.598         |
|                | NOIT distance to center, total     | 5.975         |
| chr4:118013062 | OFT center frequency               | 5.777         |
|                | OFT distance to center, total      | 6.099         |
|                | OFT center duration                | 5.373         |
|                | OFT distance to center, mean       | 5.001         |
| chr4:150582701 | SIT distance to social zone, mean  | 5.884         |
|                | SIT distance to social zone, total | 5.788         |
|                | SIT in social zone duration        | 4.324         |
| chr4:151128675 | SIT in social zone duration        | 5.820         |
|                | SIT distance to social zone mean   | 4.351         |
|                | SIT distance to social zone, total | 4.366         |
| chr4:156801420 | NOIT distance to center, total     | 5.622         |
|                | NOIT distance to center, mean      | 4.543         |
| chr6:119975012 | NOIT distance to center, mean      | 5.692         |
|                | NOIT center frequency              | 4.275         |
|                | NOIT distance to center, total     | 5.542         |
|                | NOIT total travel distance         | 5.270         |
| chr6:120117521 | NOIT total travel distance         | 5.640         |
|                | NOIT center frequency              | 4.330         |
|                | NOIT distance to center, mean      | 5.021         |
|                | NOIT distance to center, total     | 4.961         |
| chr11:33359859 | OFT total travel distance          | 8.268         |
|                | OFT center duration                | 4.125         |
|                | OFT center frequency               | 4.895         |
| chr14:44904830 | OFT distance to center, total      | 5.741         |
|                | OFT center frequency               | 4.189         |
|                | OFT distance to center, mean       | 5.096         |
| chr14:41727329 | SIT total travel distance          | 5.627         |
|                | NOIT total travel distance         | 4.291         |
| chr19:20666789 | SIT distance to object zone, mean  | 6.746         |
|                | SIT distance to object zone, total | 6.613         |
| chr19:20667417 | SIT distance to object zone, total | 6.619         |
|                | SIT distance to object zone, mean  | 6.732         |
| chr19:55339863 | SIT distance to social zone, mean  | 6.661         |
|                | SIT distance to social zone, total | 6.643         |

**Table S4.** Putatively causal coding variants, HIGH impact

| Chr | Location  | ref | alt | effect      | gene   | cDNA position | SNP change | Amino acid change | r2       | with    | dprime | phenotype |
|-----|-----------|-----|-----|-------------|--------|---------------|------------|-------------------|----------|---------|--------|-----------|
| 4   | 156219233 | G   | T   | stop gained | Clec4n | 505           | c.505G>T   | p.Glu169*         | 0.801402 | 1       |        | NOIT      |
| 4   | 156219233 | G   | T   | stop gained | Clec4n | 415           | c.415G>T   | p.Glu139*         | 0.801402 | 1       |        | NOIT      |
| 4   | 156219233 | G   | T   | stop gained | Clec4n | 403           | c.403G>T   | p.Glu135*         | 0.801402 | 1       |        | NOIT      |
| 4   | 156219240 | G   | A   | stop gained | Clec4n | 512           | c.512G>A   | p.Trp171*         | 0.801402 | 1       |        | NOIT      |
| 4   | 156219240 | G   | A   | stop gained | Clec4n | 422           | c.422G>A   | p.Trp141*         | 0.801402 | 1       |        | NOIT      |
| 4   | 156219240 | G   | A   | stop gained | Clec4n | 410           | c.410G>A   | p.Trp137*         | 0.801402 | 1       |        | NOIT      |
| 13  | 90703234  | T   | C   | stop lost   | Kcnj9  | 1618          | c.1236A>G  | p.Ter412Trpext*   | 0.99127  | 0.99707 |        | SIT       |
| 19  | 21049487  | C   | T   | stop gained | Rps15a | 343           | c.343C>T   | p.Arg115*         | 0.700642 | 0.93637 |        | SIT       |

**Table S5.** Hot spot on rat Chr1 144Mb loci has 17 genes associated psychiatric conditions in human

| Chr | Location (Human) | SNP        | Gene/Region | P-val | P-val note | Disease/Trait                                                                    | Mapped trait                                                      | PMID     |
|-----|------------------|------------|-------------|-------|------------|----------------------------------------------------------------------------------|-------------------------------------------------------------------|----------|
| 15  | 82558175         | rs17507216 | CPEB1       | 4E-10 |            | Cognitive ability, years of educational attainment or schizophrenia (pleiotropy) | schizophrenia, intelligence, self reported educational attainment | 31374203 |
| 15  | 82585958         | rs783540   | CPEB1       | 2E-08 |            | Schizophrenia                                                                    | schizophrenia                                                     | 31740837 |
| 15  | 82585958         | rs783540   | CPEB1       | 3E-08 |            | Schizophrenia                                                                    | schizophrenia                                                     | 28991256 |
| 15  | 82585958         | rs783540   | CPEB1       | 5E-08 | (EA)       | Schizophrenia                                                                    | schizophrenia                                                     | 30285260 |
| 15  | 82585958         | rs783540   | CPEB1       | 7E-08 |            | Schizophrenia                                                                    | schizophrenia                                                     | 26198764 |

Continuation of Table

|    |                    |          |       |         |                                                                                            |                  |          |
|----|--------------------|----------|-------|---------|--------------------------------------------------------------------------------------------|------------------|----------|
| 15 | 82585958s783540    | CPEB1    | 9E-09 |         | Schizophrenia                                                                              | schizophrenia    | 30285260 |
| 15 | 83591790s141308780 | H3GL3    | 3E-06 |         | Schizophrenia                                                                              | schizophrenia    | 26198764 |
| 15 | 83845538s7162542   | ADAMTSL3 | 1E-14 | (men)   | Waist circumference adjusted for BMI (adjusted for smoking behaviour)                      | smoking behavior | 28443625 |
| 15 | 83845538s7162542   | ADAMTSL3 | 1E-12 | (women) | Waist circumference adjusted for BMI (adjusted for smoking behaviour)                      | smoking behavior | 28443625 |
| 15 | 83845538s7162542   | ADAMTSL3 | 1E-16 | (men)   | Waist circumference adjusted for BMI (joint analysis main effects and smoking interaction) | smoking behavior | 28443625 |
| 15 | 83845538s7162542   | ADAMTSL3 | 1E-23 |         | Waist circumference adjusted for BMI (adjusted for smoking behaviour)                      | smoking behavior | 28443625 |
| 15 | 83845538s7162542   | ADAMTSL3 | 1E-12 | (women) | Waist circumference adjusted for BMI (joint analysis main effects and smoking interaction) | smoking behavior | 28443625 |
| 15 | 83845538s7162542   | ADAMTSL3 | 1E-25 |         | Waist circumference adjusted for BMI (joint analysis main effects and smoking interaction) | smoking behavior | 28443625 |
| 15 | 84037709s950169    | ADAMTSL3 | 1E-10 | (EA)    | Schizophrenia                                                                              | schizophrenia    | 30285260 |
| 15 | 84037709s950169    | ADAMTSL3 | 1E-11 |         | Schizophrenia                                                                              | schizophrenia    | 25056061 |
| 15 | 84037709s950169    | ADAMTSL3 | 1E-11 |         | Schizophrenia                                                                              | schizophrenia    | 30285260 |
| 15 | 84037709s950169    | ADAMTSL3 | 1E-11 |         | Schizophrenia                                                                              | schizophrenia    | 26198764 |

Continuation of Table

|    |                   |              |       |                                                                                                                                                                                                           |                                                                                                                                                                                              |          |
|----|-------------------|--------------|-------|-----------------------------------------------------------------------------------------------------------------------------------------------------------------------------------------------------------|----------------------------------------------------------------------------------------------------------------------------------------------------------------------------------------------|----------|
| 15 | 84037709s950169   | ADAMTSL3     | 3E-12 | Schizophrenia                                                                                                                                                                                             | schizophrenia                                                                                                                                                                                | 28991256 |
| 15 | 8458141fs11633534 | LINC00933    | 8E-14 | Schizophrenia                                                                                                                                                                                             | schizophrenia                                                                                                                                                                                | 31740837 |
|    |                   | ZSCAN2       |       |                                                                                                                                                                                                           |                                                                                                                                                                                              |          |
| 15 | 84582607s12902052 | LINC00933    | 7E-09 | Bipolar disorder                                                                                                                                                                                          | bipolar disorder                                                                                                                                                                             | 33263727 |
|    |                   | ZSCAN2       |       |                                                                                                                                                                                                           |                                                                                                                                                                                              |          |
| 15 | 84594463s11638445 | LINC00933    | 3E-10 | Cognitive ability, years of educational attainment or schizophrenia (pleiotropy)                                                                                                                          | schizophrenia, intelligence, self reported educational attainment                                                                                                                            | 31374203 |
|    |                   | ZSCAN2       |       |                                                                                                                                                                                                           |                                                                                                                                                                                              |          |
| 15 | 84606344s748455   | ZSCAN2       | 6E-13 | Schizophrenia (MTAG)                                                                                                                                                                                      | schizophrenia                                                                                                                                                                                | 32606422 |
| 15 | 84610573s71395455 | ZSCAN2       | 4E-08 | Bipolar I disorder                                                                                                                                                                                        | bipolar I disorder                                                                                                                                                                           | 31043756 |
| 15 | 84610573s71395455 | ZSCAN2       | 5E-14 | Anorexia nervosa, attention-deficit/hyperactivity disorder, autism spectrum disorder, bipolar disorder, major depression, obsessive-compulsive disorder, schizophrenia, or Tourette syndrome (pleiotropy) | anorexia nervosa, obsessive-compulsive disorder, attention deficit hyperactivity disorder, Tourette syndrome, unipolar depression, schizophrenia, autism spectrum disorder, bipolar disorder | 31835028 |
| 15 | 84664594s12908161 | NMB - SEC11A | 5E-10 | Schizophrenia                                                                                                                                                                                             | schizophrenia                                                                                                                                                                                | 26198764 |

Continuation of Table

|    |                                 |       |                      |                                                                                                                                               |                                                                                                                          |          |
|----|---------------------------------|-------|----------------------|-----------------------------------------------------------------------------------------------------------------------------------------------|--------------------------------------------------------------------------------------------------------------------------|----------|
| 15 | 84664594s12908161NMB - SEC11A   | 9E-10 |                      | Schizophrenia                                                                                                                                 | schizophrenia                                                                                                            | 29483656 |
| 15 | 84676882s55945116SEC11A         | 6E-07 |                      | Response to ketamine in bipolar disorder or major depression (antidepressant effects)                                                         | unipolar depression, depressive symptom measurement, response to ketamine, bipolar disorder                              | 30552317 |
| 15 | 84680172s12440825SEC11A         | 1E-06 | (Japanese)           | $\beta$ -hydroxy-1-methylpropylmercapturic acid levels in smokers                                                                             | smoking behavior, 3-hydroxy-1-methylpropylmercapturic acid measurement                                                   | 26053186 |
| 15 | 84812610s35828350ZNF592 - ALPK3 | 6E-11 |                      | Autism spectrum disorder or schizophrenia                                                                                                     | schizophrenia, autism spectrum disorder                                                                                  | 28540026 |
| 15 | 84833784s891288 ALPK3           | 6E-07 | (Japanese)           | $\beta$ -hydroxy-1-methylpropylmercapturic acid levels in smokers                                                                             | smoking behavior, 3-hydroxy-1-methylpropylmercapturic acid measurement                                                   | 26053186 |
| 15 | 88180481s1104918 NTRK3          | 6E-06 | (Modelling analysis) | Autism spectrum disorder, attention deficit-hyperactivity disorder, bipolar disorder, major depressive disorder, and schizophrenia (combined) | attention deficit hyperactivity disorder, unipolar depression, schizophrenia, autism spectrum disorder, bipolar disorder | 23453885 |
| 15 | 88215343s14679790NTRK3          | 4E-07 |                      | Schizophrenia                                                                                                                                 | schizophrenia                                                                                                            | 26198764 |

Continuation of Table

|    |          |            |                     |       |          |                                                                                                    |                                                               |          |
|----|----------|------------|---------------------|-------|----------|----------------------------------------------------------------------------------------------------|---------------------------------------------------------------|----------|
| 15 | 8832793  | rs62024303 | NTRK3-AS1<br>NA     | 3E-07 | (Latino) | 3-hydroxypropylmercapturic acid levels in smokers                                                  | smoking behavior, 3-hydroxypropylmercapturic acid measurement | 26053186 |
| 15 | 88402647 | rs28541419 | NA-MRPL46           | 3E-08 |          | Depression (broad)                                                                                 | unipolar depression                                           | 29662059 |
| 15 | 88871064 | rs1879529  | ACAN                | 1E-06 | (women)  | Waist circumference adjusted for BMI (joint analysis main effects and smoking interaction)         | smoking behavior                                              | 28443625 |
| 15 | 88871064 | rs1879529  | ACAN                | 1E-07 |          | Waist circumference adjusted for BMI (adjusted for smoking behaviour)                              | smoking behavior                                              | 28443625 |
| 15 | 88871064 | rs1879529  | ACAN                | 8E-08 |          | Waist circumference adjusted for BMI (joint analysis main effects and smoking interaction)         | smoking behavior                                              | 28443625 |
| 15 | 88871064 | rs1879529  | ACAN                | 9E-07 | (women)  | Waist circumference adjusted for BMI (adjusted for smoking behaviour)                              | smoking behavior                                              | 28443625 |
| 15 | 89318595 | rs2307441  | POLG                | 3E-06 | (HAM-A)  | Venlafaxine response in generalised anxiety disorder (responders vs non-responders after 24 weeks) | response to venlafaxine, generalized anxiety disorder         | 28437668 |
| 15 | 89356393 | rs12595305 | POLG-DT<br>MIR9-3HG | 4E-06 |          | Schizophrenia                                                                                      | schizophrenia                                                 | 26198764 |
| 15 | 89357656 | rs758129   | POLG-DT<br>MIR9-3HG | 3E-07 |          | Schizophrenia                                                                                      | schizophrenia                                                 | 30285260 |

Continuation of Table

|    |                   |                     |       |      |                                           |                                         |          |
|----|-------------------|---------------------|-------|------|-------------------------------------------|-----------------------------------------|----------|
| 15 | 89357656s758129   | POLG-DT<br>MIR9-3HG | 3E-08 |      | Schizophrenia                             | schizophrenia                           | 28991256 |
| 15 | 89357656s758129   | POLG-DT<br>MIR9-3HG | 6E-06 | (EA) | Schizophrenia                             | schizophrenia                           | 30285260 |
| 15 | 89357656s758129   | POLG-DT<br>MIR9-3HG | 8E-10 |      | Schizophrenia                             | schizophrenia                           | 31740837 |
| 15 | 89370401s176644   | MIR9-3HG            | 3E-09 |      | Smoking status<br>(ever vs never smokers) | smoking behavior                        | 30643258 |
| 15 | 89694587s8035597  | WDR93               | 6E-07 |      | Deliberate self-harm                      | Self-injurious behavior                 | 32473944 |
| 15 | 89729839s12148067 | WDR93               | 9E-07 |      | Deliberate self-harm                      | Self-injurious behavior                 | 32473944 |
| 15 | 90873320s17514846 | FURIN               | 3E-12 |      | Schizophrenia                             | schizophrenia                           | 29483656 |
| 15 | 90873320s17514846 | FURIN               | 6E-11 | (EA) | Schizophrenia                             | schizophrenia                           | 30285260 |
| 15 | 90875067s8032315  | FURIN               | 2E-08 |      | Autism spectrum disorder or schizophrenia | schizophrenia, autism spectrum disorder | 28540026 |
| 15 | 90883330s4702     | FURIN               | 1E-10 |      | Autism spectrum disorder or schizophrenia | schizophrenia, autism spectrum disorder | 28540026 |



Continuation of Table

|    |               |       |       |                                                                                                                                                                                                           |                                                                                                                                                                                              |          |
|----|---------------|-------|-------|-----------------------------------------------------------------------------------------------------------------------------------------------------------------------------------------------------------|----------------------------------------------------------------------------------------------------------------------------------------------------------------------------------------------|----------|
| 15 | 90883330s4702 | FURIN | 2E-11 | Anorexia nervosa, attention-deficit/hyperactivity disorder, autism spectrum disorder, bipolar disorder, major depression, obsessive-compulsive disorder, schizophrenia, or Tourette syndrome (pleiotropy) | anorexia nervosa, obsessive-compulsive disorder, attention deficit hyperactivity disorder, Tourette syndrome, unipolar depression, schizophrenia, autism spectrum disorder, bipolar disorder | 31835028 |
| 15 | 90883330s4702 | FURIN | 2E-11 | Schizophrenia                                                                                                                                                                                             | schizophrenia                                                                                                                                                                                | 31268507 |
| 15 | 90883330s4702 | FURIN | 2E-15 | Schizophrenia                                                                                                                                                                                             | schizophrenia                                                                                                                                                                                | 31740837 |
| 15 | 90883330s4702 | FURIN | 3E-11 | Cognitive ability, years of educational attainment or schizophrenia (pleiotropy)                                                                                                                          | schizophrenia, intelligence, self reported educational attainment                                                                                                                            | 31374203 |
| 15 | 90883330s4702 | FURIN | 3E-12 | Schizophrenia                                                                                                                                                                                             | schizophrenia                                                                                                                                                                                | 26198764 |
| 15 | 90883330s4702 | FURIN | 5E-11 | Bipolar disorder (MTAG)                                                                                                                                                                                   | bipolar disorder                                                                                                                                                                             | 32606422 |
| 15 | 90883330s4702 | FURIN | 5E-12 | Schizophrenia (MTAG)                                                                                                                                                                                      | schizophrenia                                                                                                                                                                                | 32606422 |
| 15 | 90883330s4702 | FURIN | 8E-14 | Schizophrenia (MTAG)                                                                                                                                                                                      | schizophrenia                                                                                                                                                                                | 32606422 |
| 15 | 90883330s4702 | FURIN | 8E-14 | Schizophrenia                                                                                                                                                                                             | schizophrenia                                                                                                                                                                                | 25056061 |

---

Continuation of Table

|    |                      |       |               |                        |
|----|----------------------|-------|---------------|------------------------|
| 15 | 90885060s11539637FES | 4E-09 | Schizophrenia | schizophrenia 30285260 |
|----|----------------------|-------|---------------|------------------------|

---

1 All data obtained from GWAS catalog ( ? )

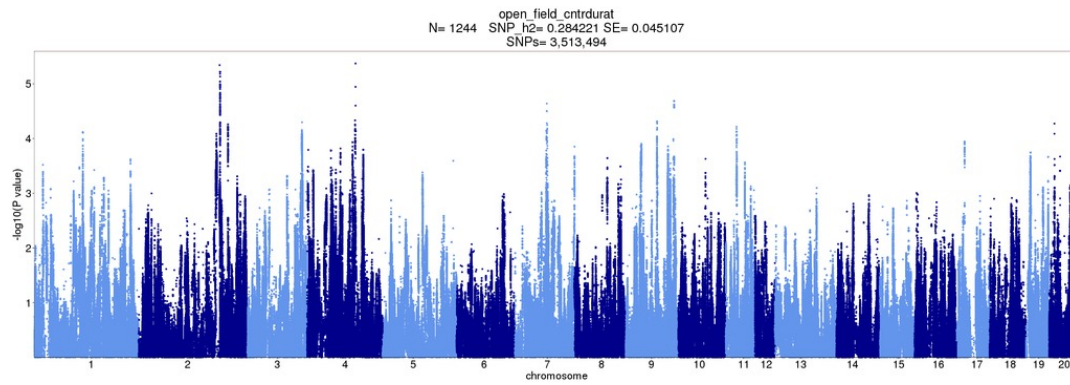

**Figure S1.** OFT GWAS: Duration in center zone, mean

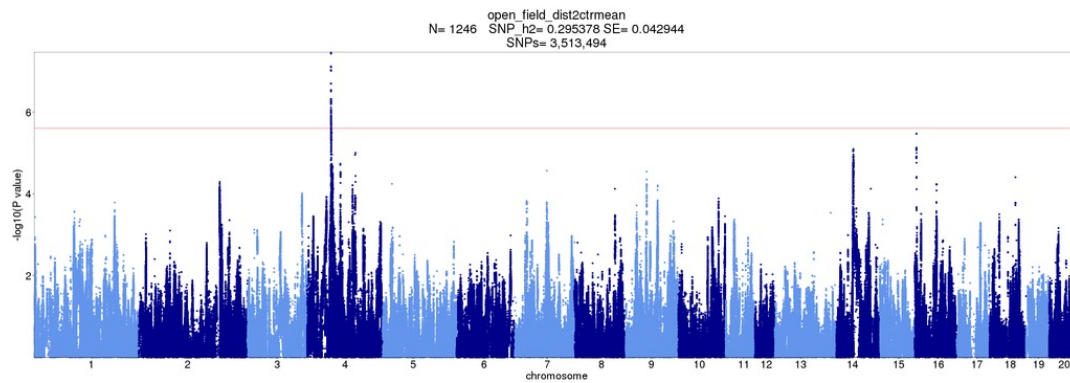

**Figure S2.** OFT GWAS: Mean distance to center zone

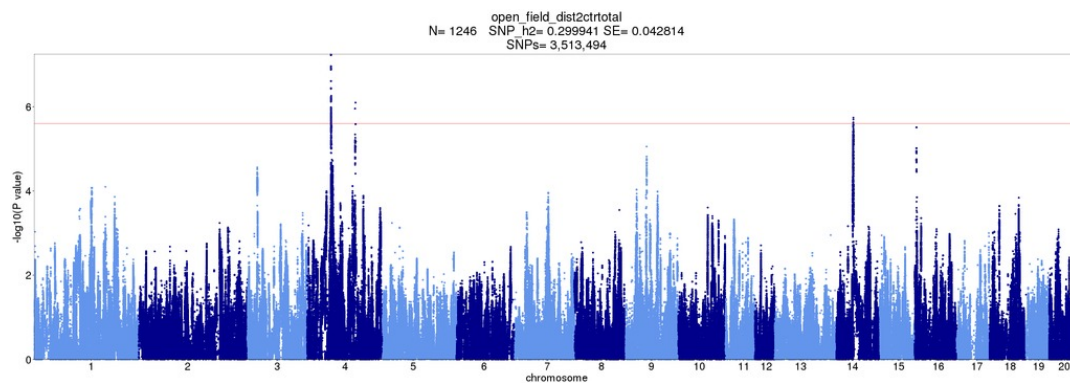

**Figure S3.** OFT GWAS: Total distance to center zone

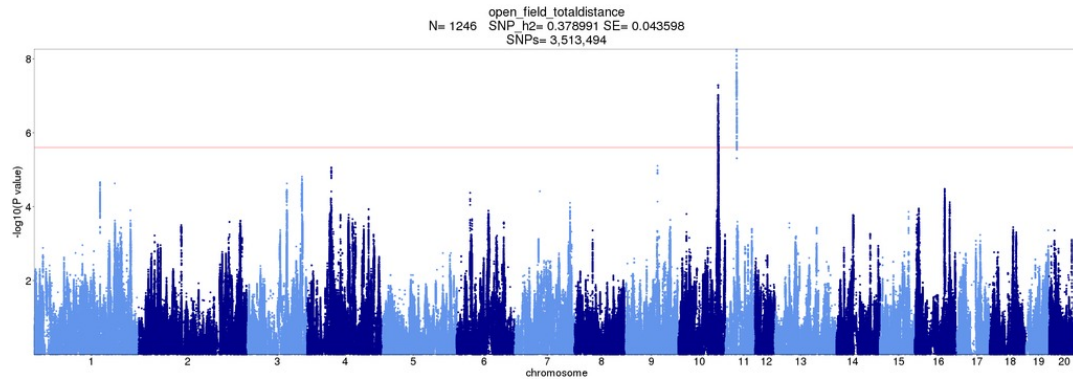

**Figure S4.** OFT GWAS: Total travel distance

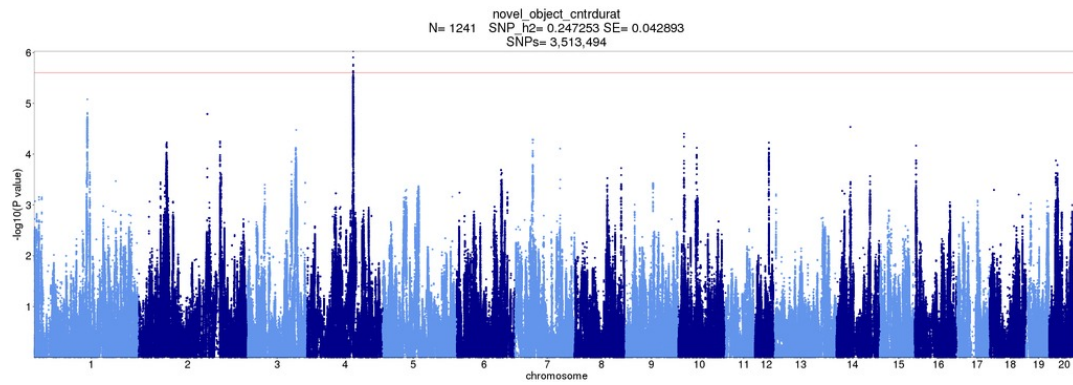

**Figure S5.** NOIT GWAS: Duration in center zone

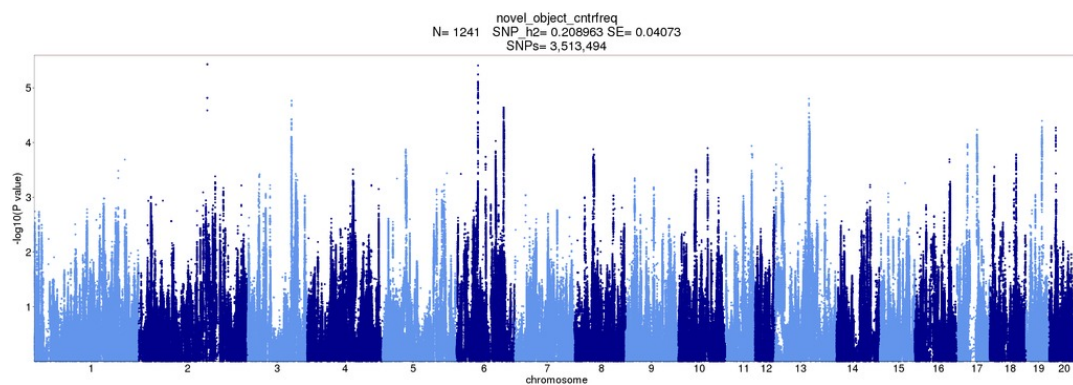

**Figure S6.** NOIT GWAS: Frequency of entering center zone

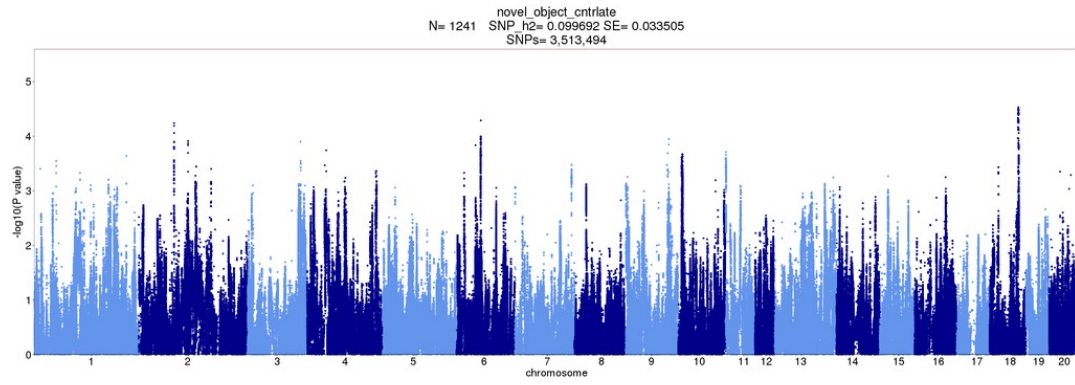

**Figure S7.** NOIT GWAS: Latency of entering center zone

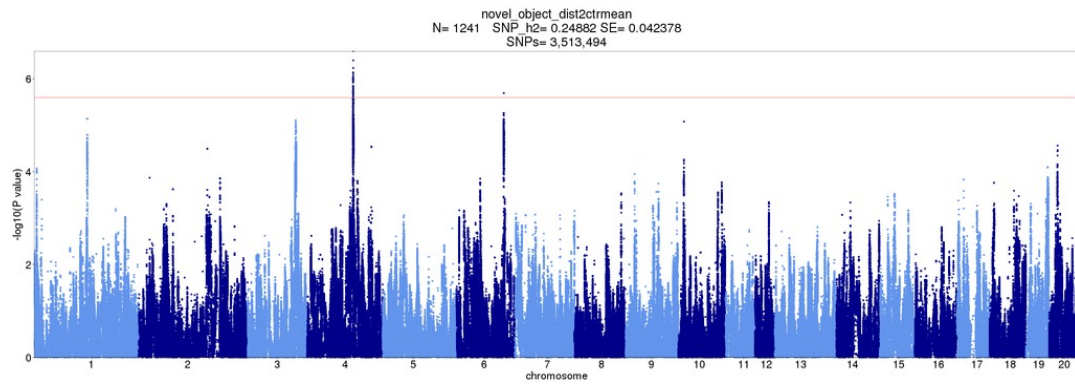

**Figure S8.** NOIT GWAS: Mean distance to center zone

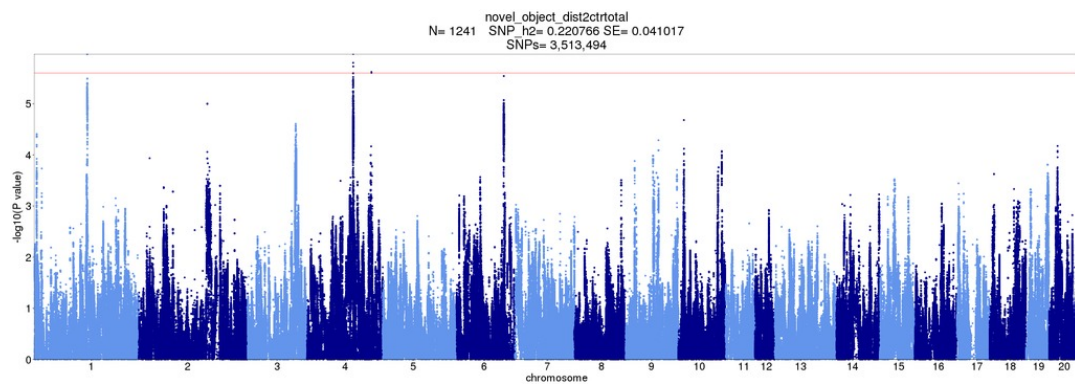

**Figure S9.** NOIT GWAS: Total distance to center zone

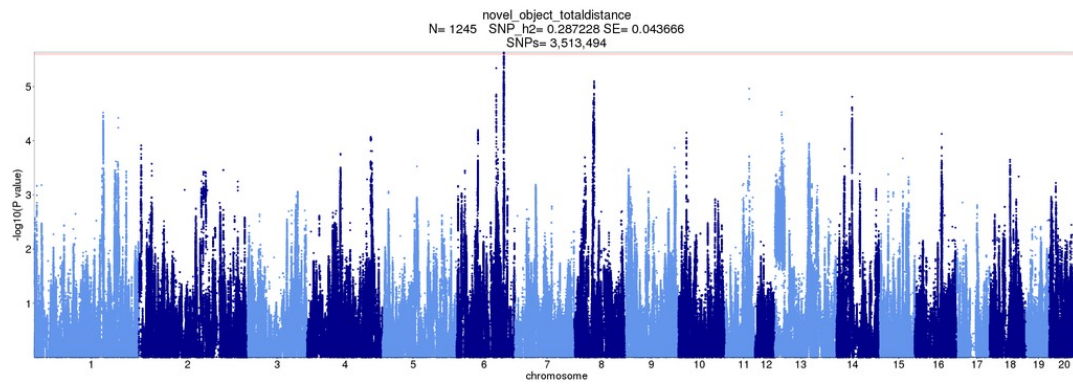

**Figure S10.** NOIT GWAS: Total travel distance

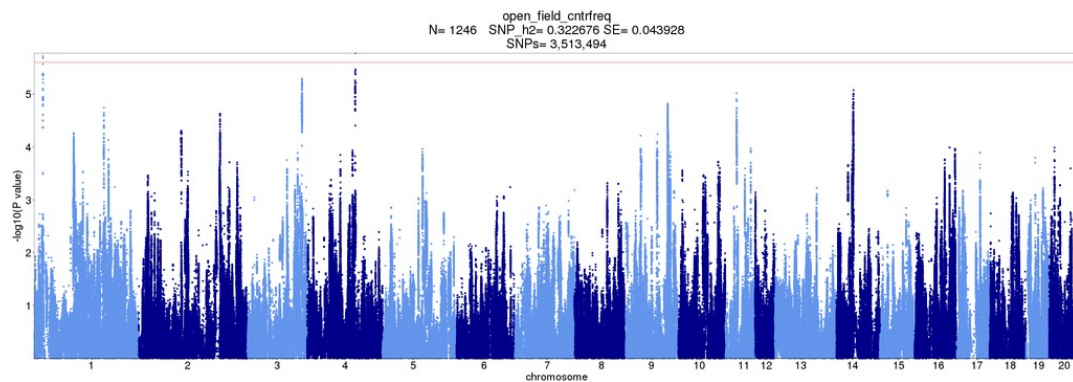

**Figure S11.** NOIT GWAS: Frequency of entering center zone, mean

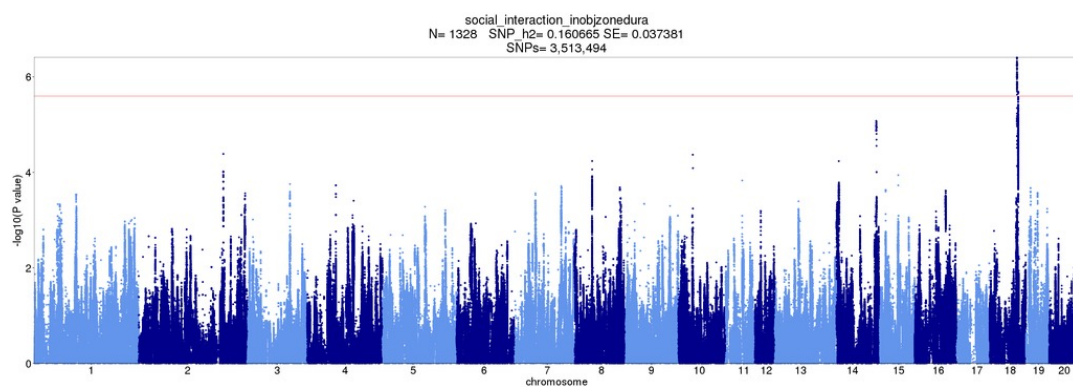

**Figure S12.** SIT GWAS: Duration in object zone

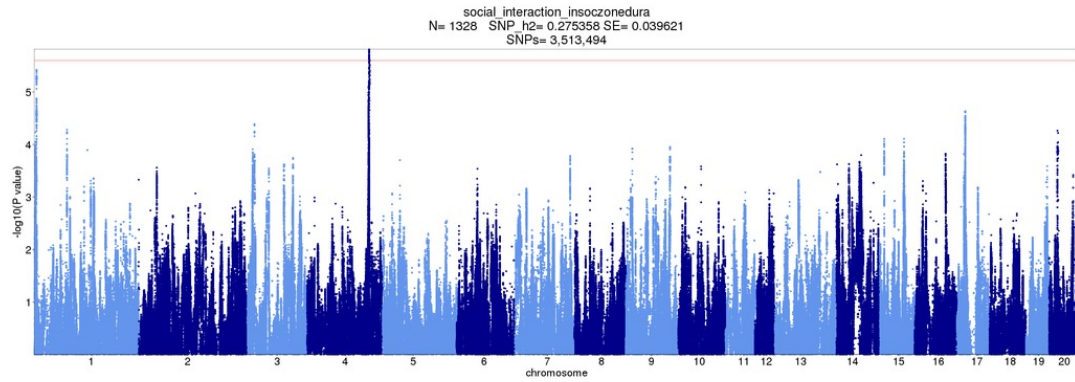

**Figure S13.** SIT GWAS: Duration in social zone

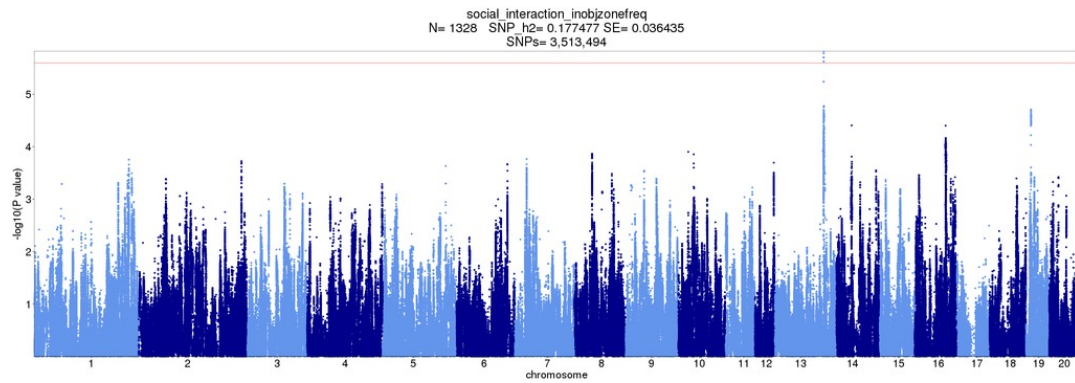

**Figure S14.** SIT GWAS: Frequency of entering object zone

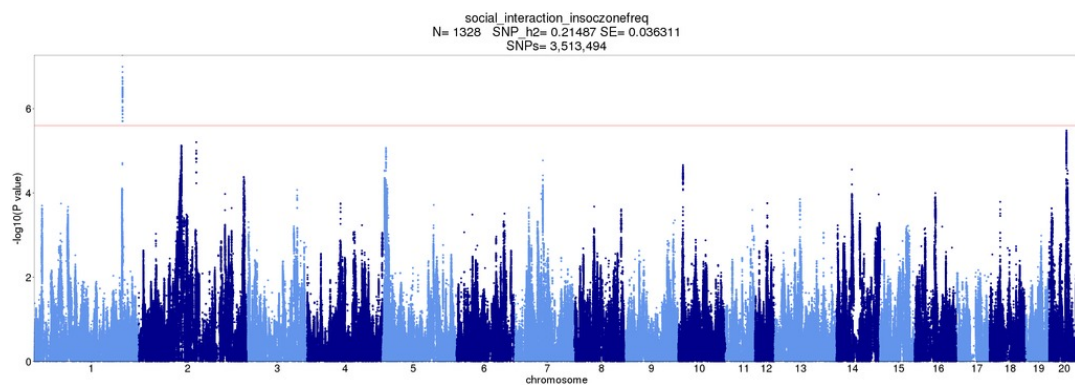

**Figure S15.** SIT GWAS: Frequency of entering social zone

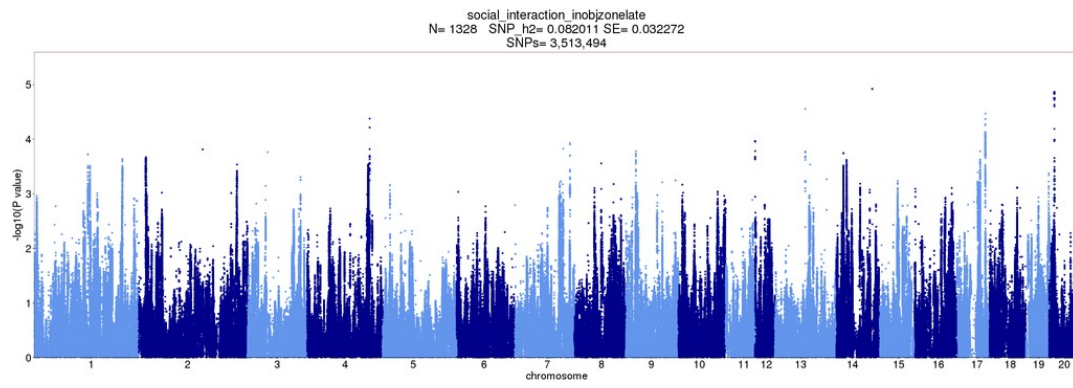

**Figure S16.** SIT GWAS: Latency of entering object zone

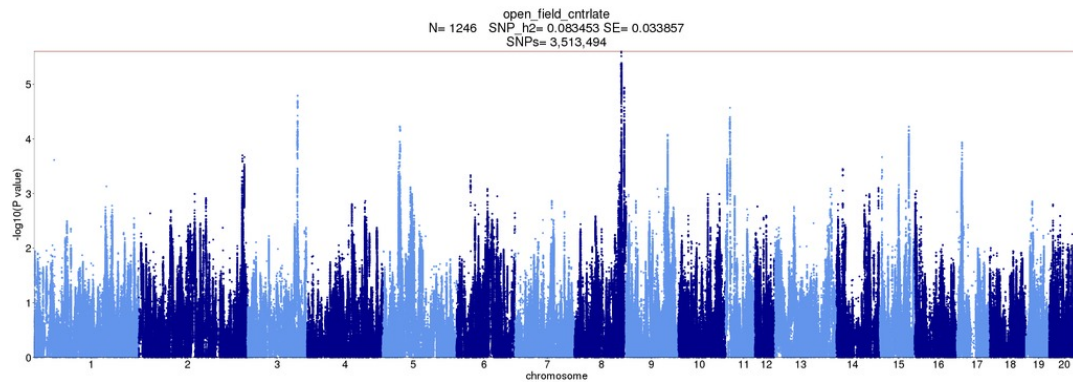

**Figure S17.** SIT GWAS: Latency of entering center zone, mean

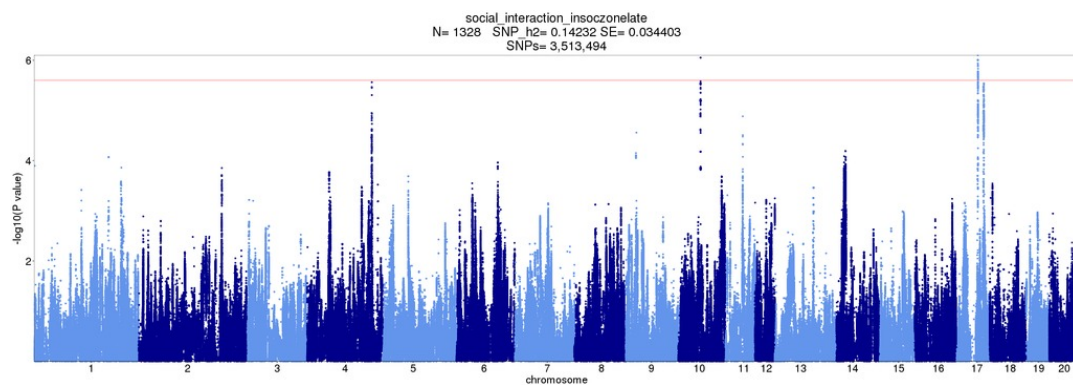

**Figure S18.** SIT GWAS: Latency of entering social zone

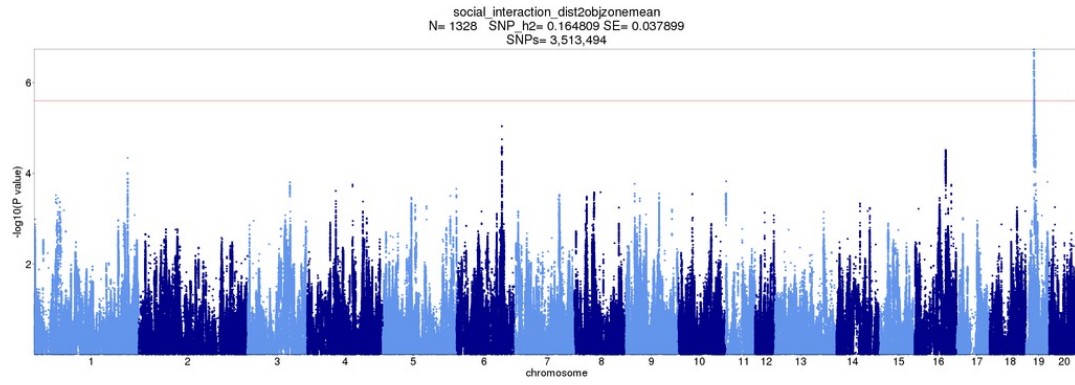

**Figure S19.** SIT GWAS: Mean distance to object zone

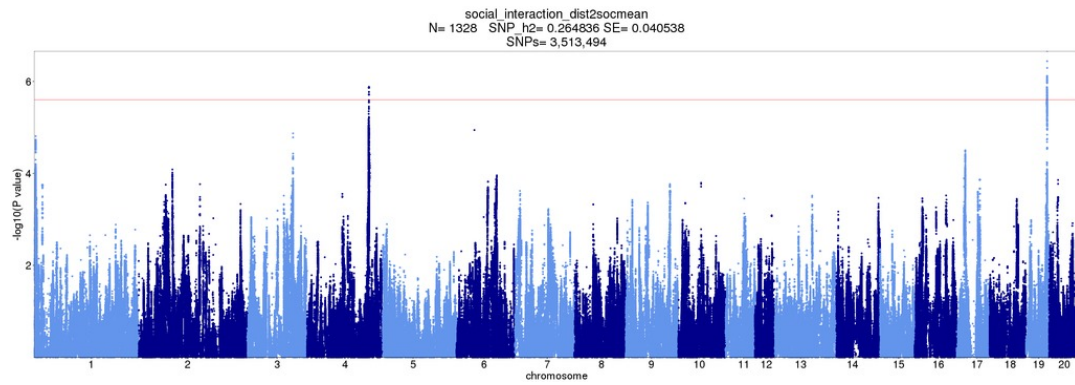

**Figure S20.** SIT GWAS: Mean distance to social zone

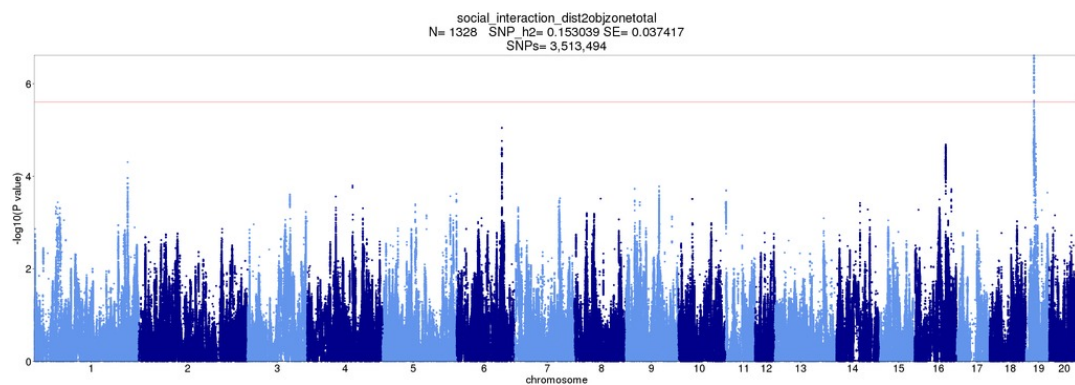

**Figure S21.** SIT GWAS: Total distance to object zone



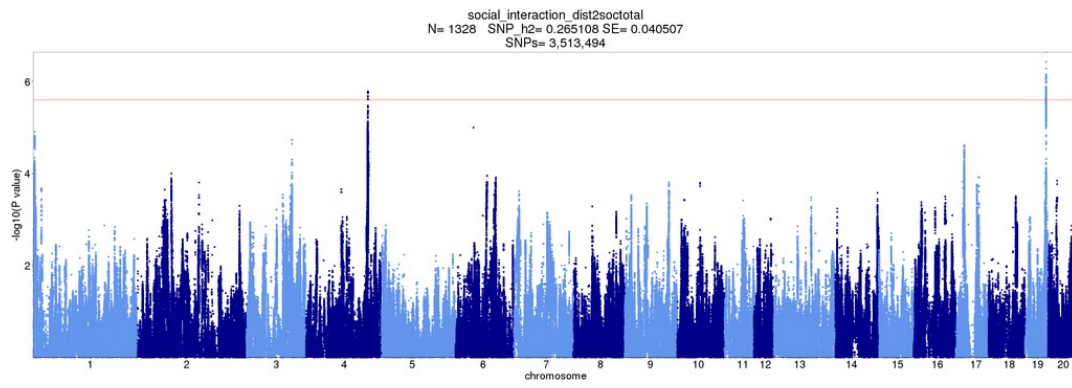

**Figure S22.** SIT GWAS: Total distance to social zone

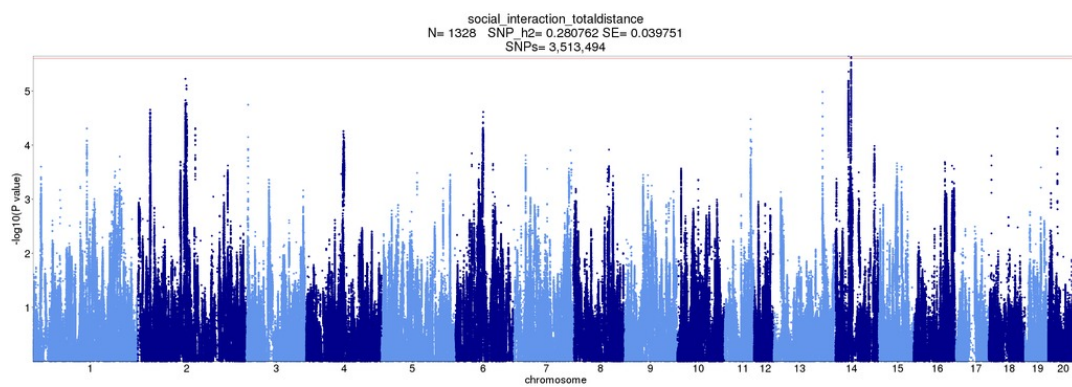

**Figure S23.** SIT GWAS: Total travel distance

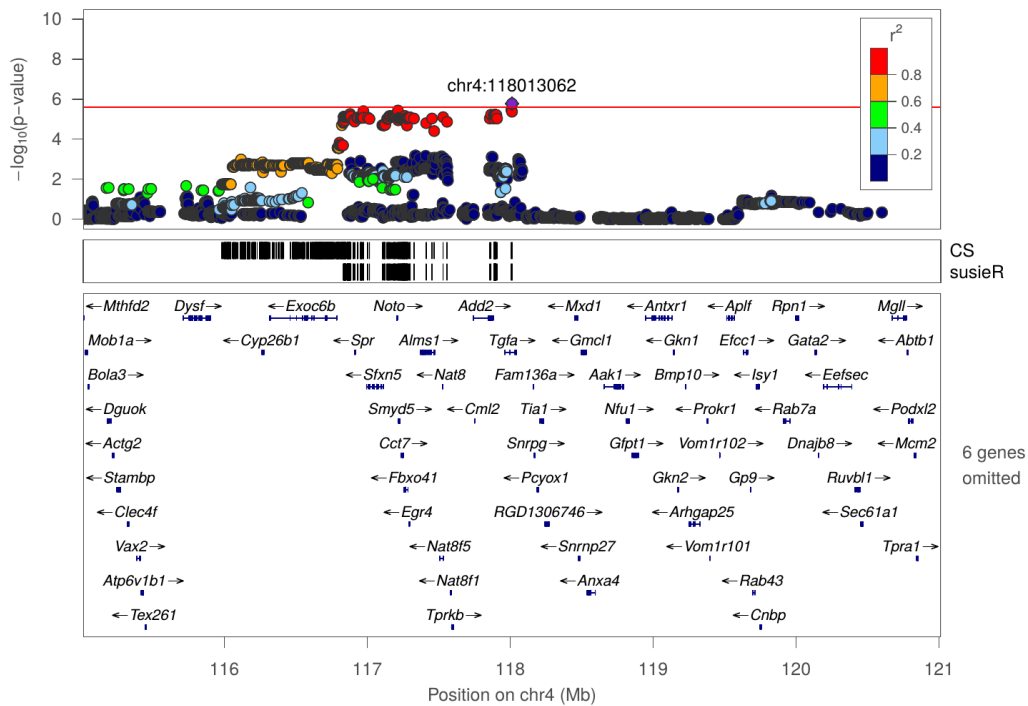

**Figure S24.** Regional association plot for OFT: Frequency of entering center zone at chr4:118013062

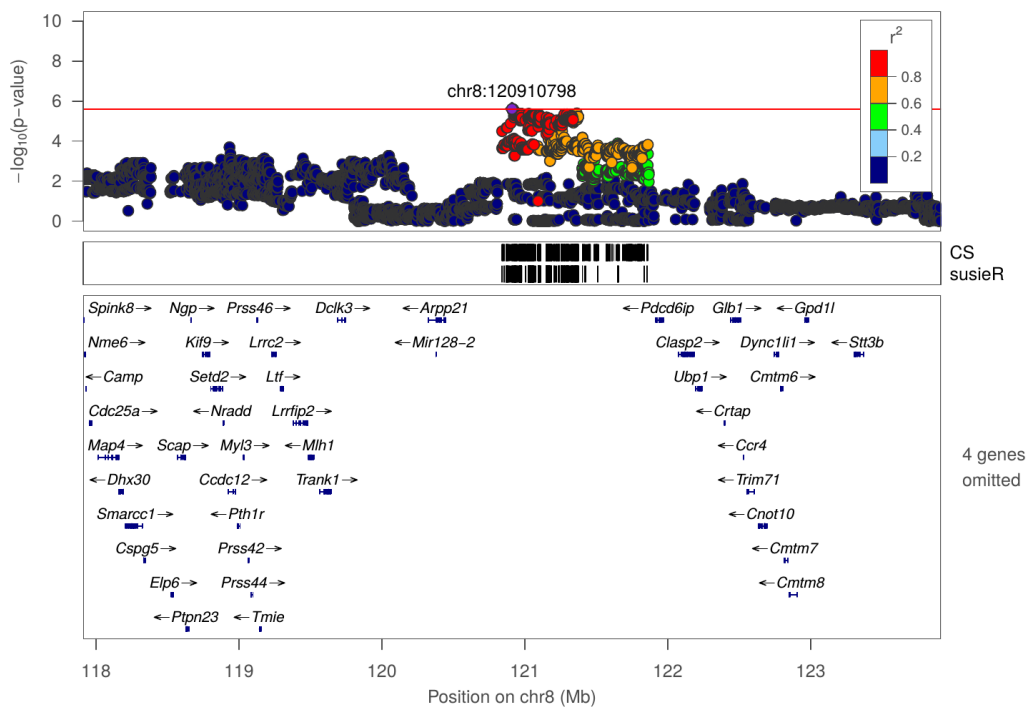

**Figure S25.** Regional association plot for OFT: Latency of entering center zone at chr8:120910798

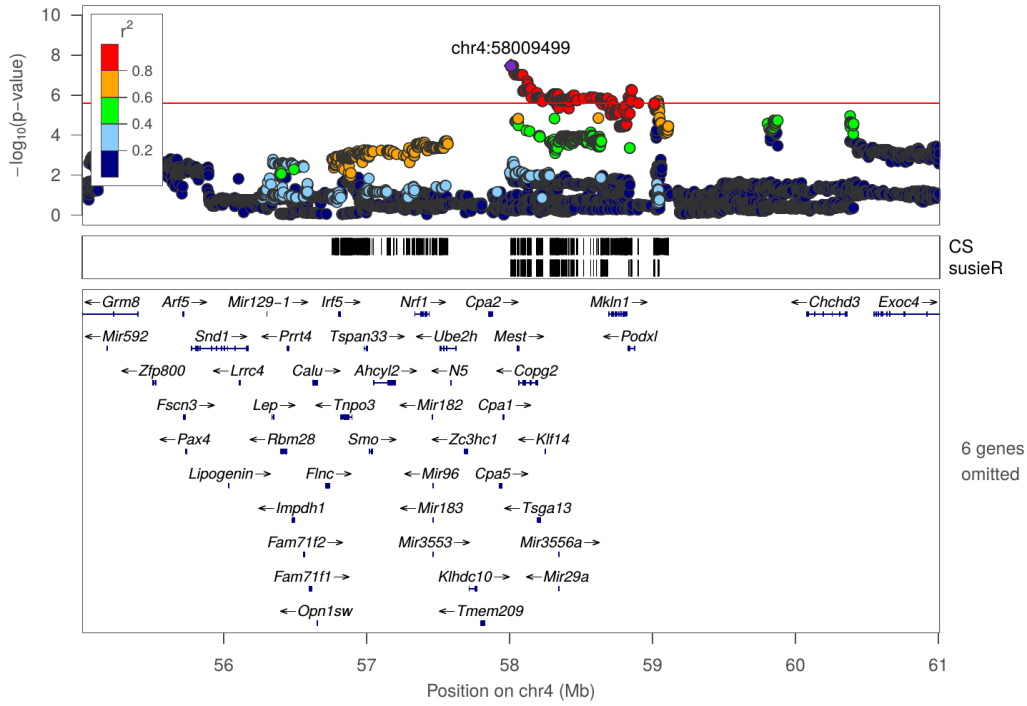

**Figure S26.** Regional association plot for OFT: Mean distance to center zone at chr4:58009499

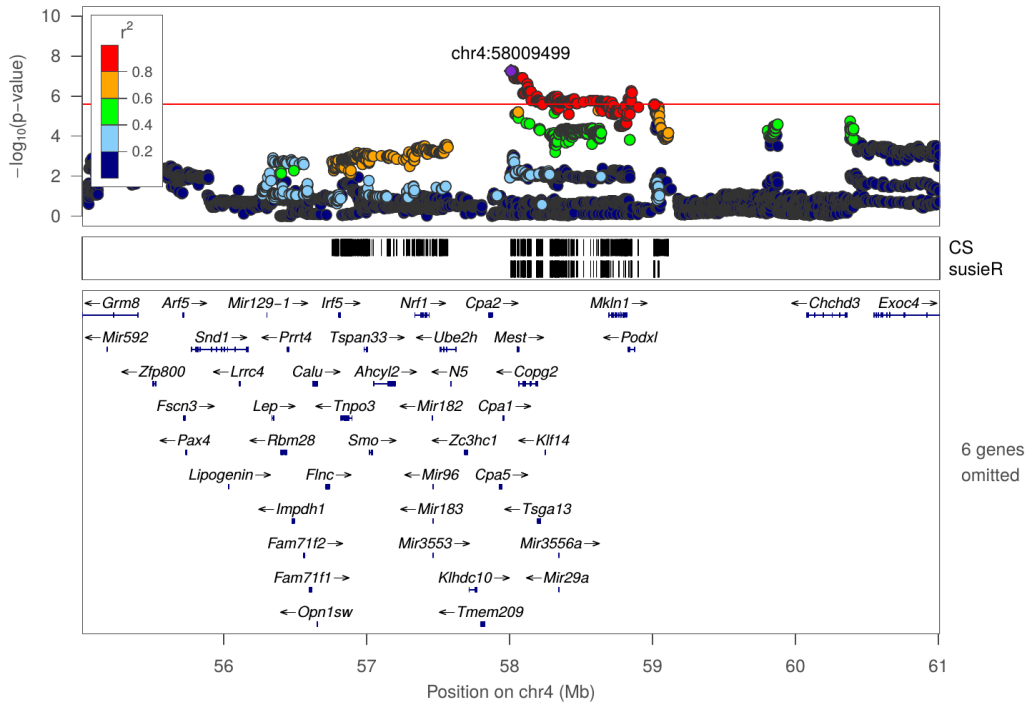

**Figure S27.** Regional association plot for OFT: Total distance to center zone at chr4:58009499

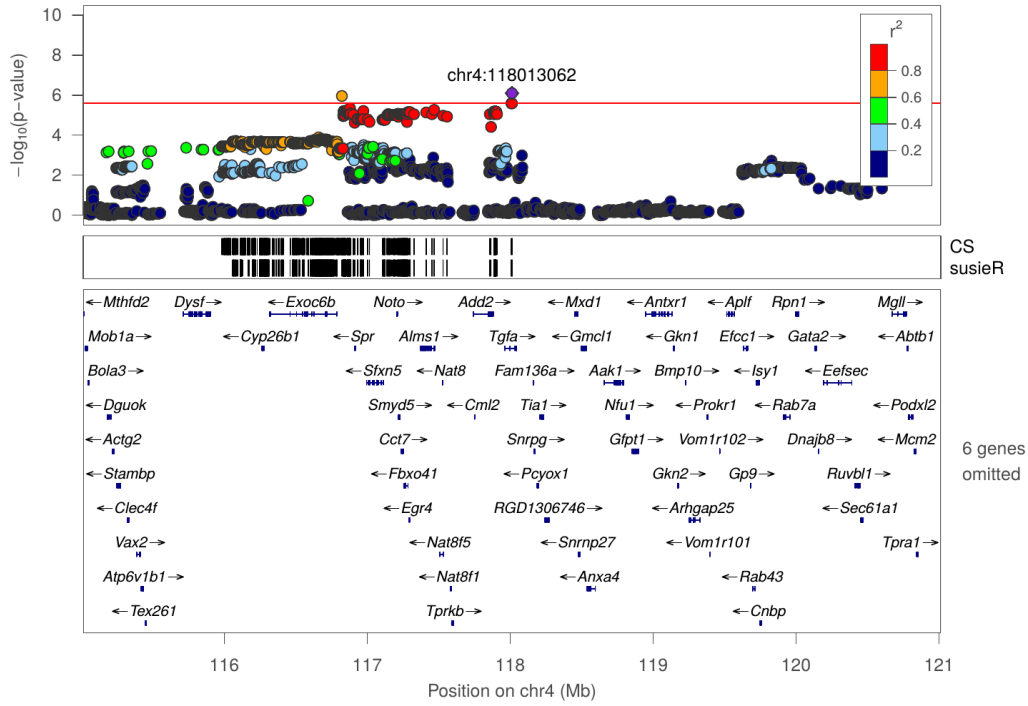

**Figure S28.** Regional association plot for OFT: Total distance to center zone at chr4:118013062

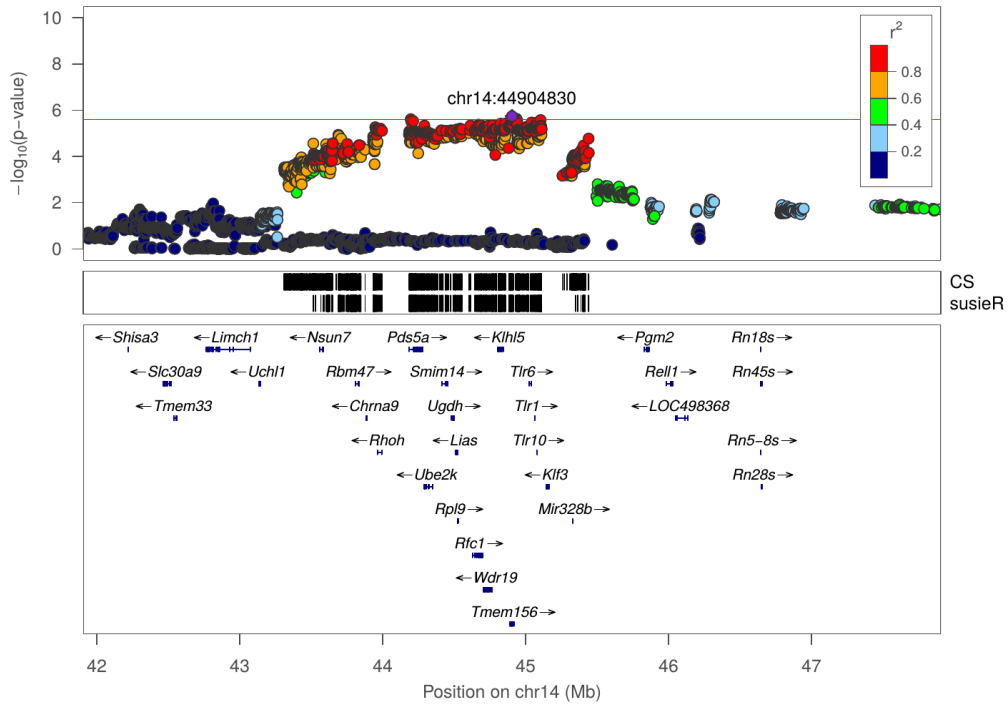

**Figure S29.** Regional association plot for OFT: Total distance to center zone at chr14:44904830

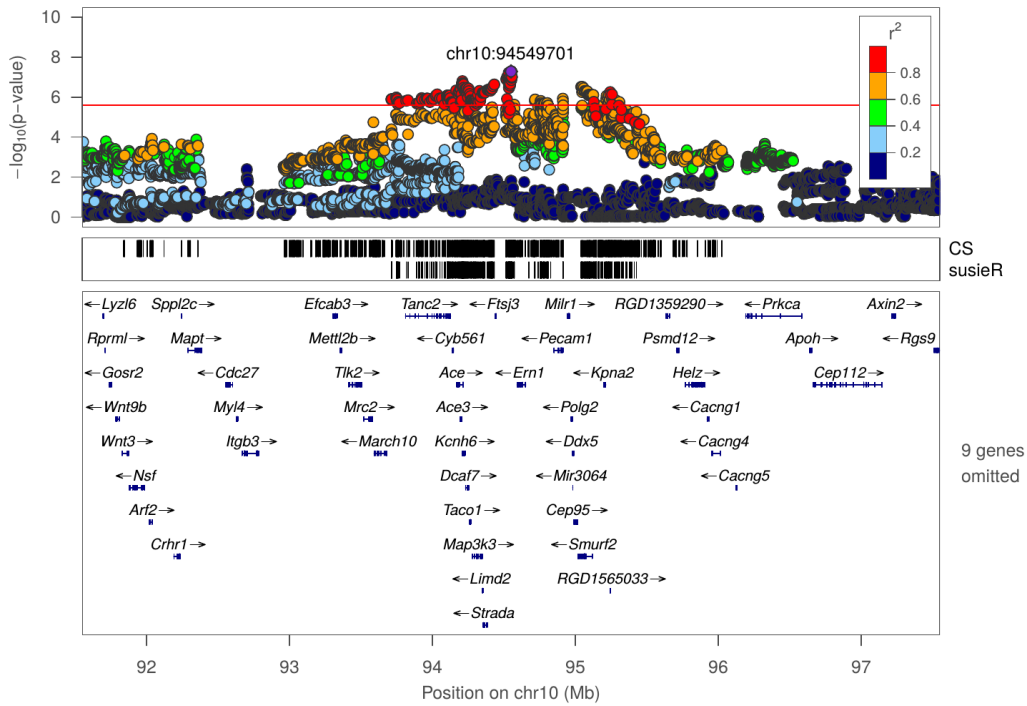

**Figure S30.** Regional association plot for OFT: Total travel distance at chr10:94549701

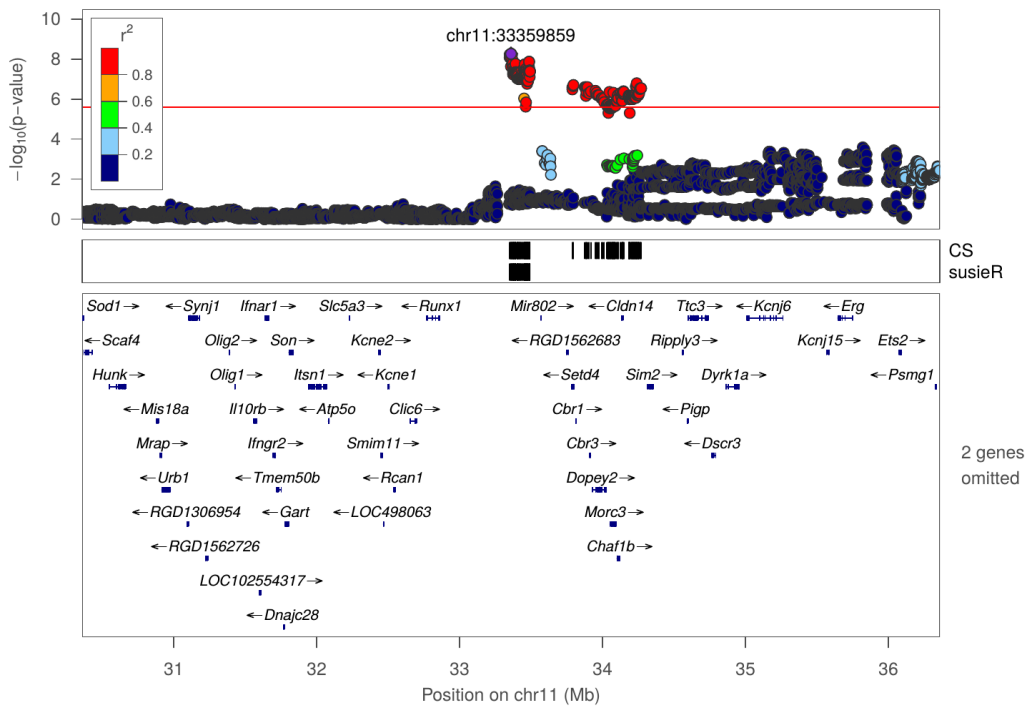

**Figure S31.** Regional association plot for OFT: Total travel distance at chr11:33359859

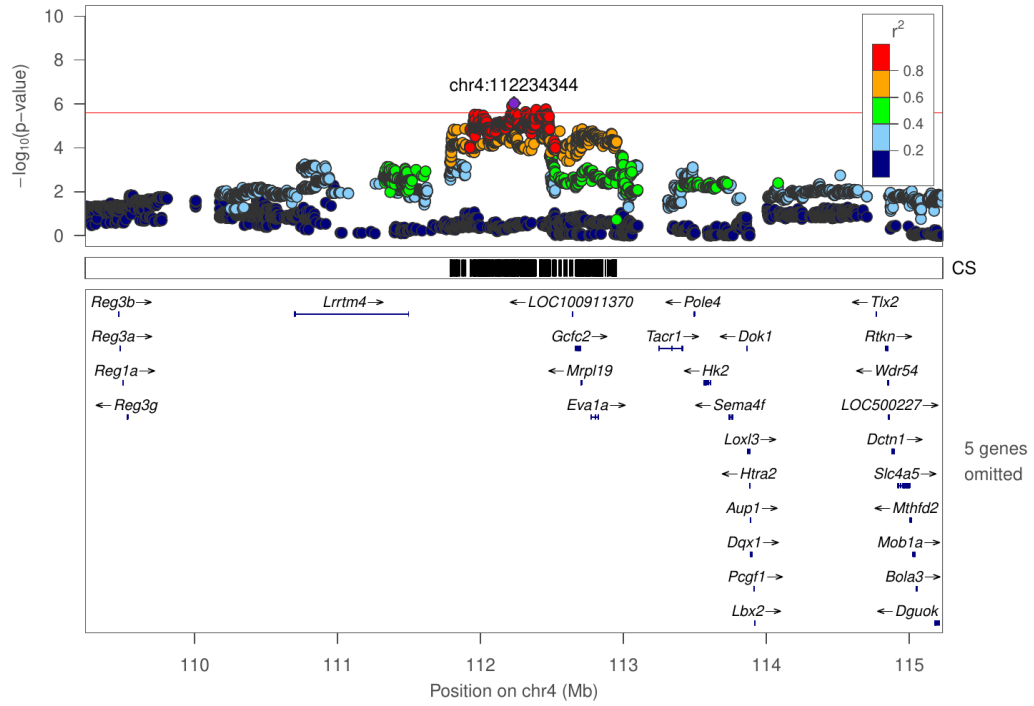

**Figure S32.** Regional association plot for NOIT: Duration in center zone at chr4:112234344

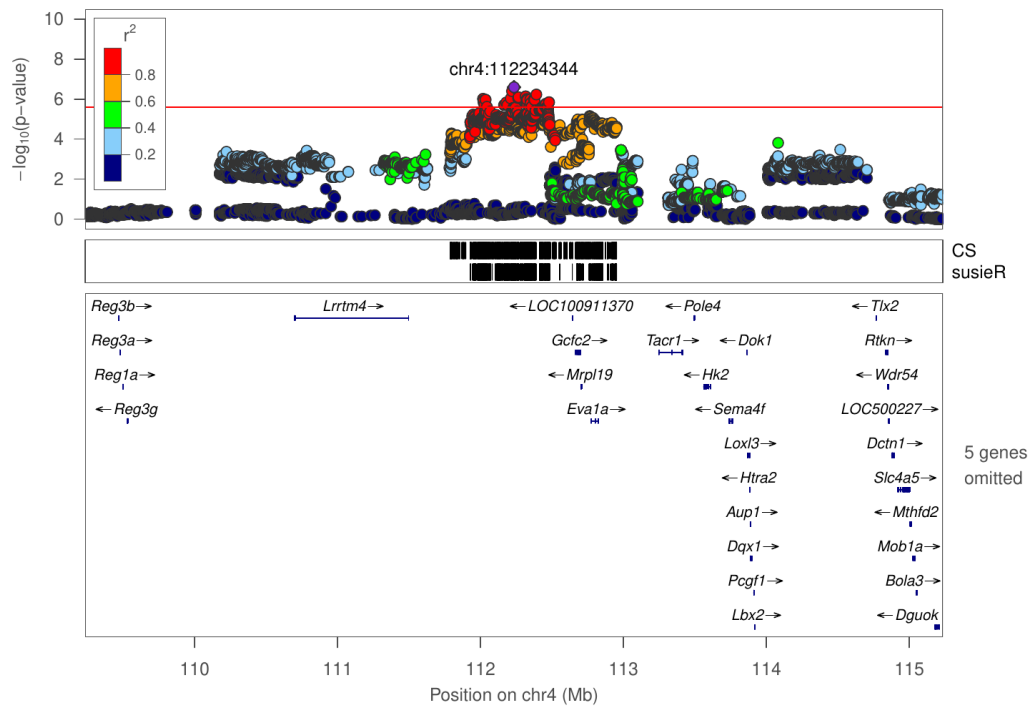

**Figure S33.** Regional association plot for NOIT: Mean distance to center zone at chr4:112234344

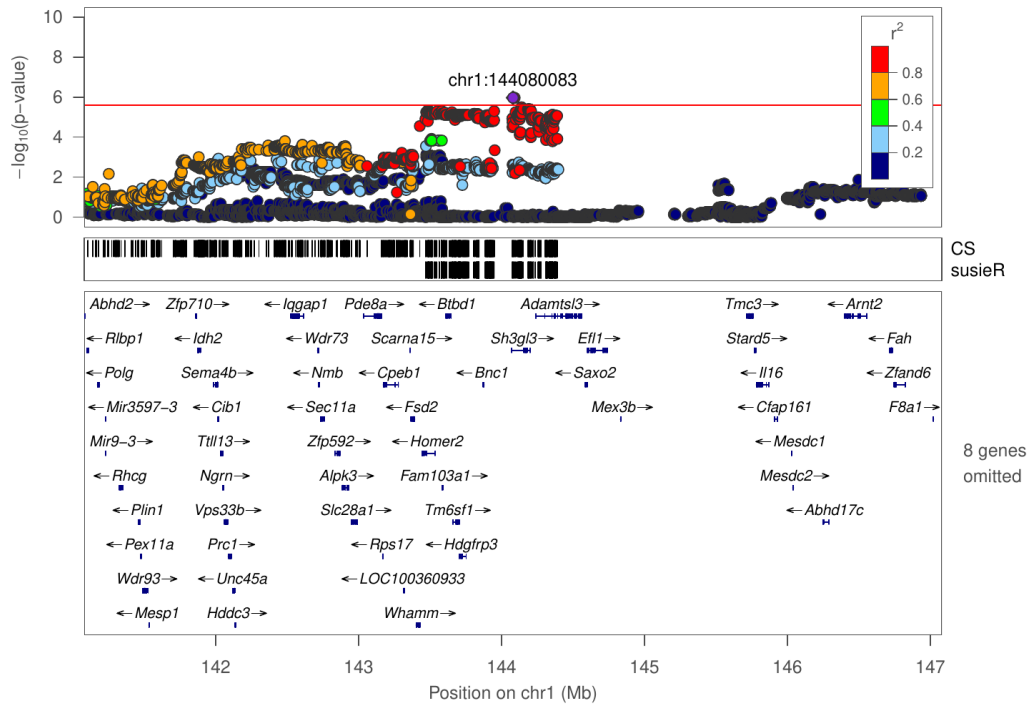

**Figure S34.** Regional association plot for NOIT: Total distance to center zone at chr1:144080083

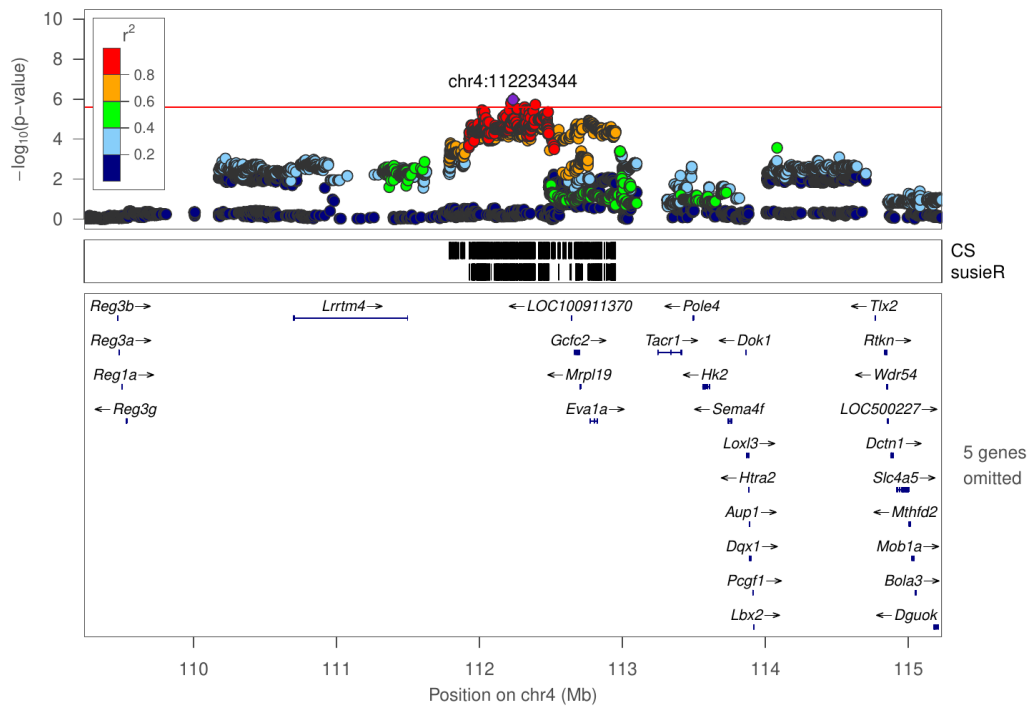

**Figure S35.** Regional association plot for NOIT: Total distance to center zone at chr4:112234344

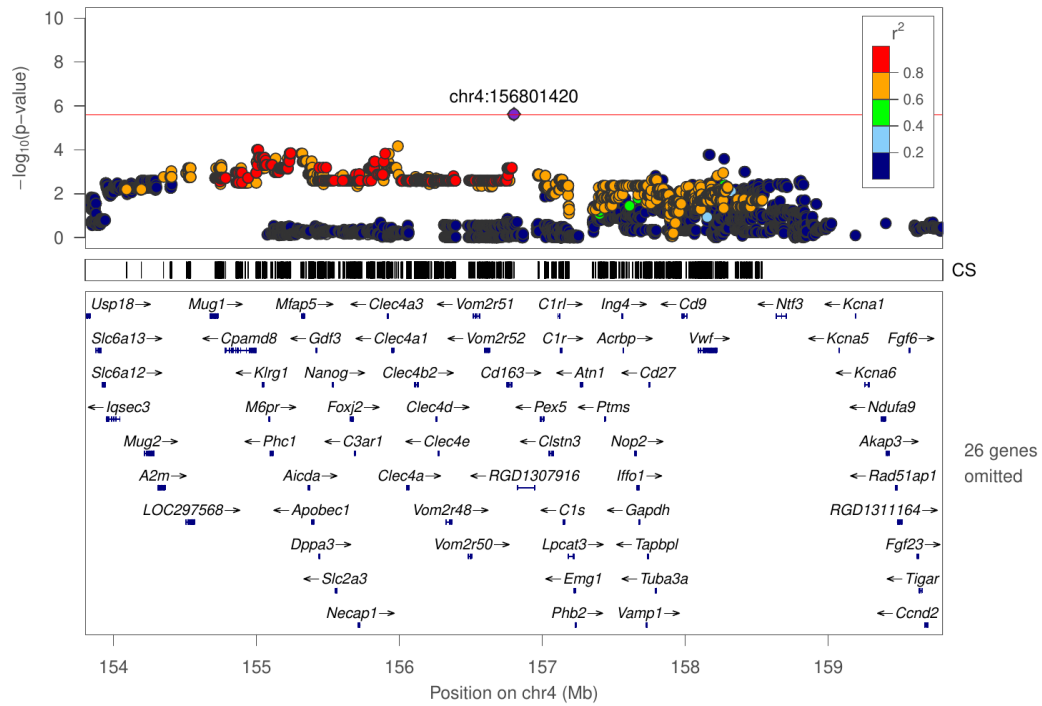

**Figure S36.** Regional association plot for NOIT: Total distance to center zone at chr4:156801420

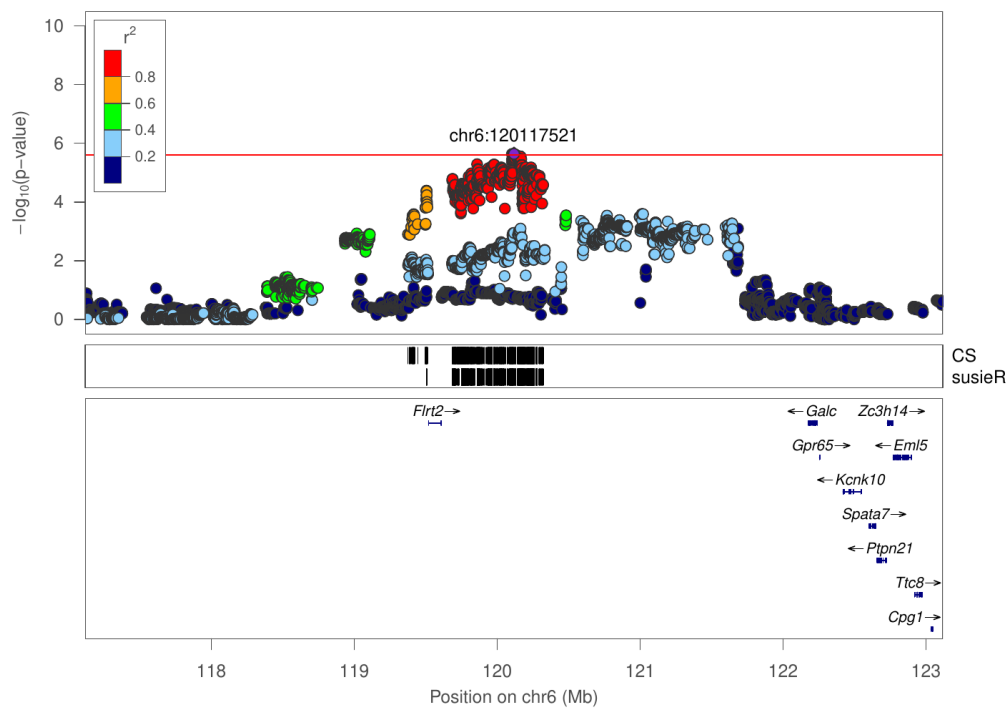

**Figure S37.** Regional association plot for NOIT: Total travel distance at chr6:120117521



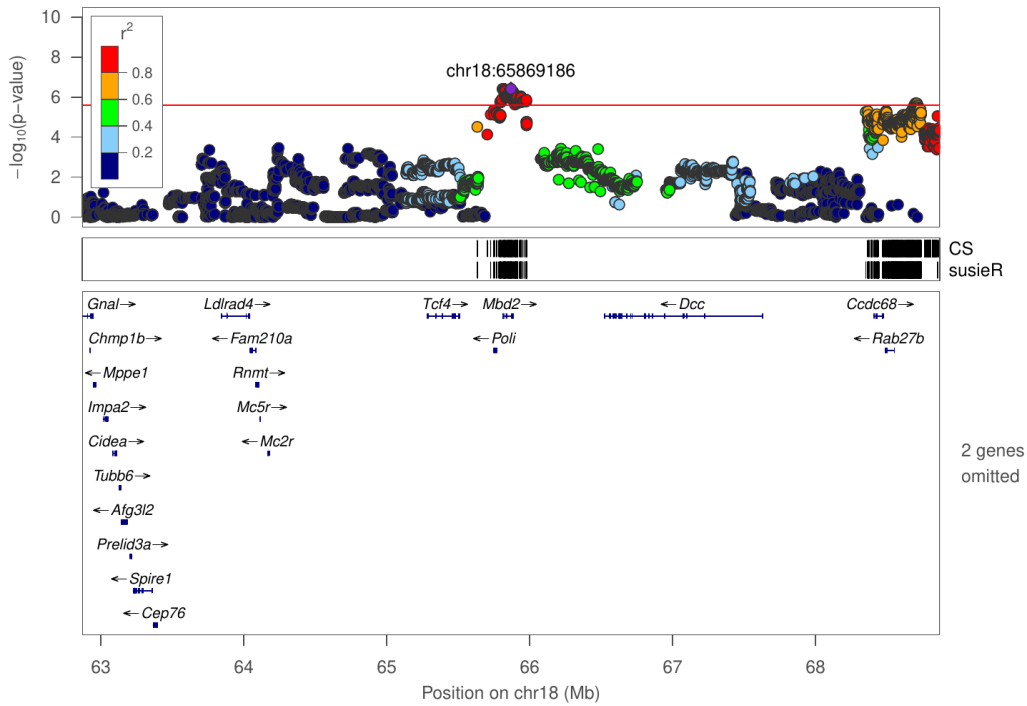

**Figure S38.** Regional association plot for SIT: Duration in object zone at chr18:65869186

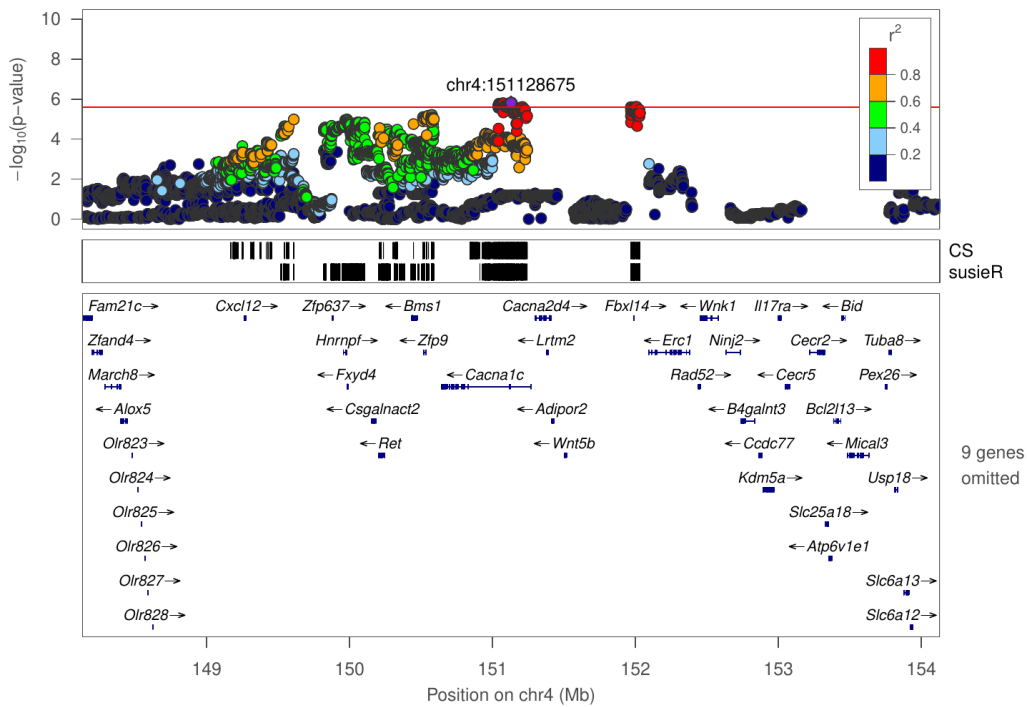

**Figure S39.** Regional association plot for SIT: Duration in social zone at chr4:151128675

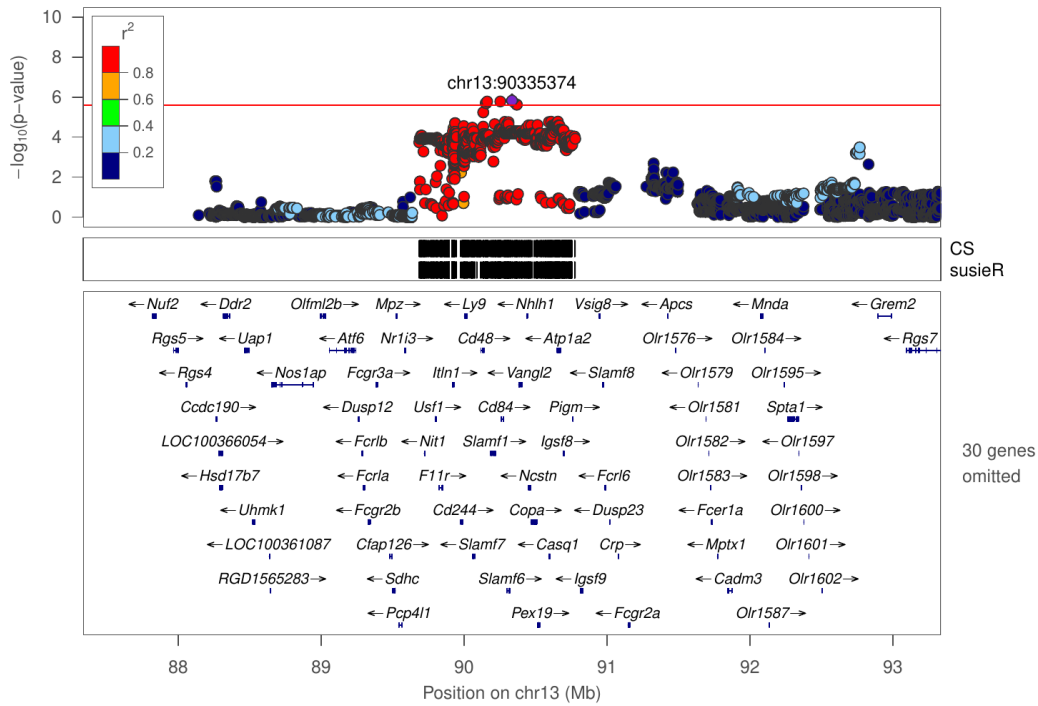

**Figure S40.** Regional association plot for SIT: Frequency of entering object zone at chr13:90335374

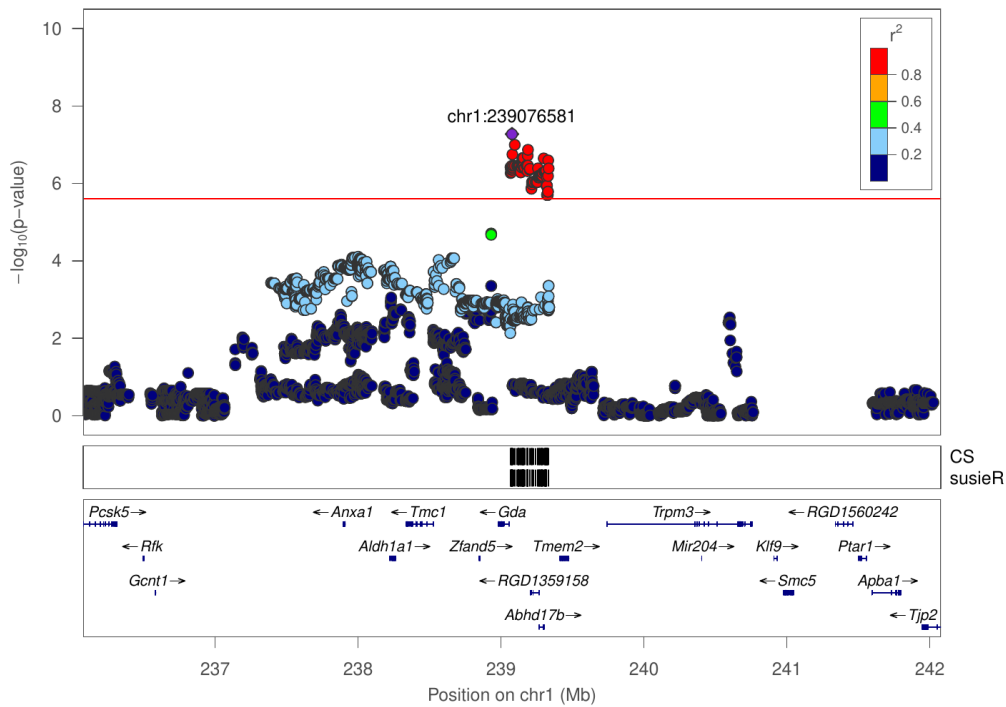

**Figure S41.** Regional association plot for SIT: Frequency of entering social zone at chr1:239076581

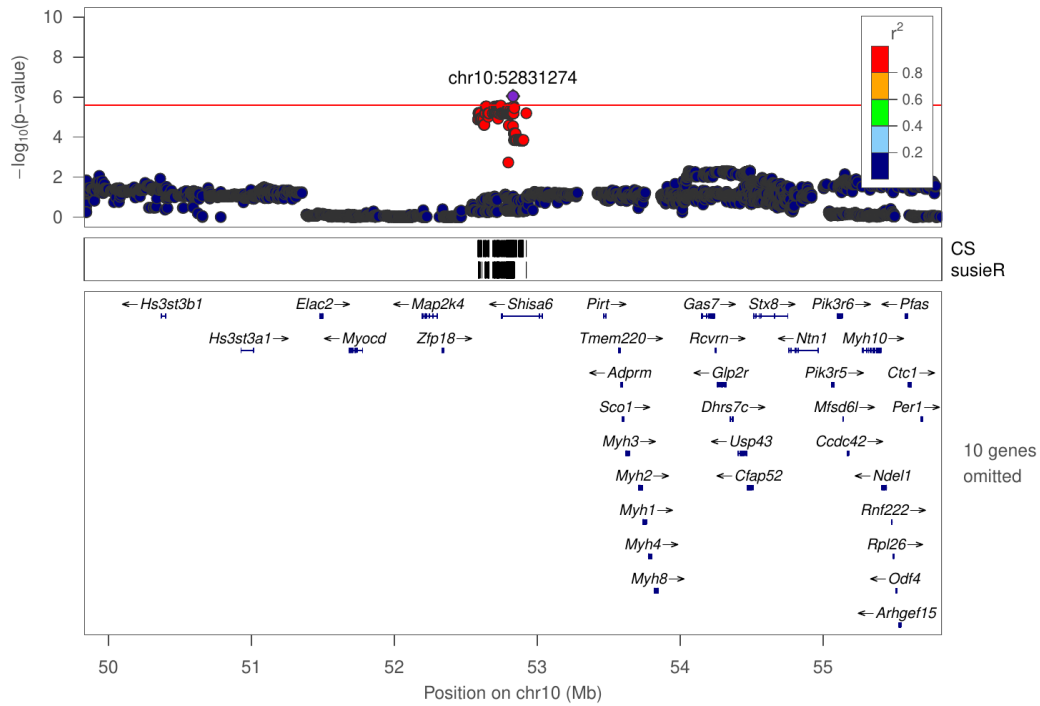

**Figure S42.** Regional association plot for SIT: Latency of entering social zone at chr10:52831274

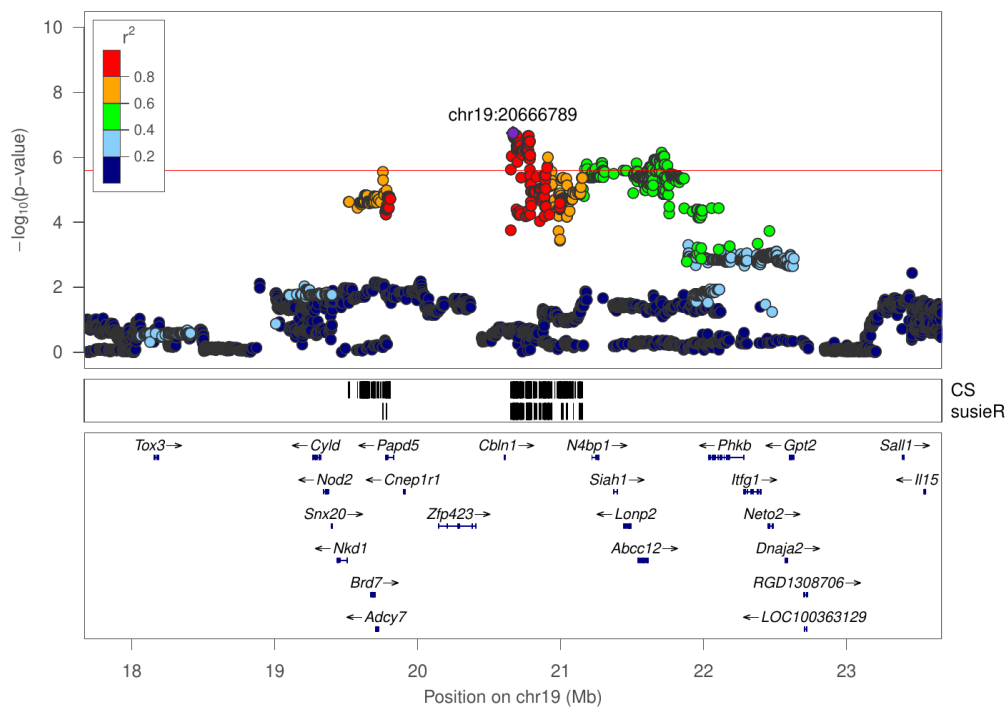

**Figure S43.** Regional association plot for SIT: Mean distance to object zone at chr19:20666789

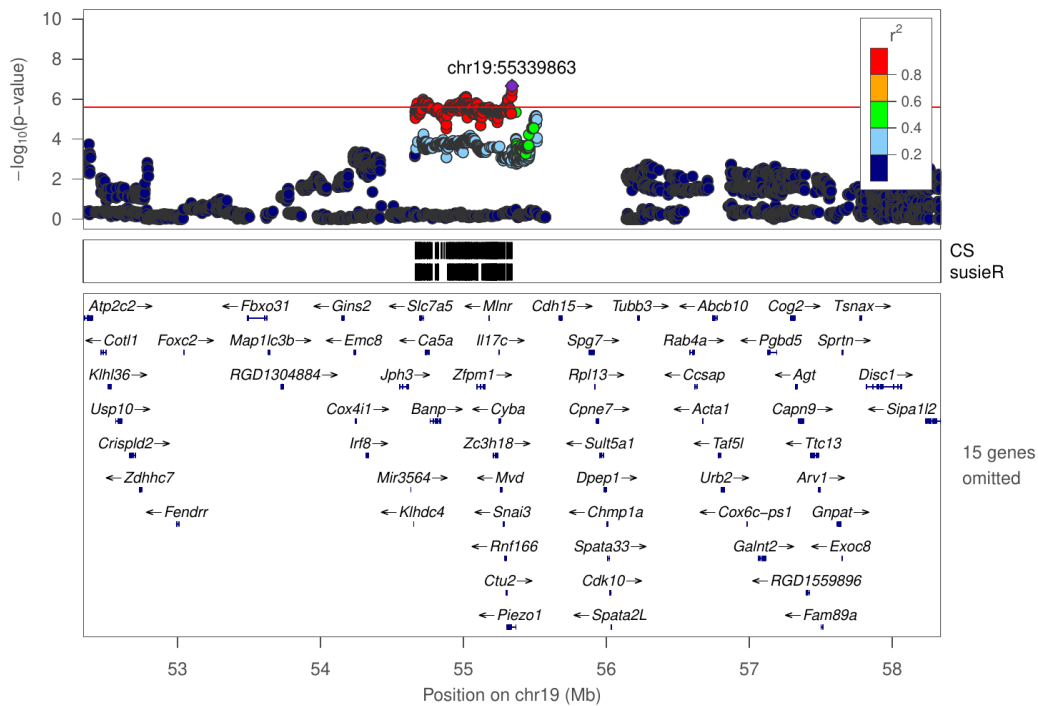

**Figure S44.** Regional association plot for SIT: Mean distance to social zone at chr19:55339863

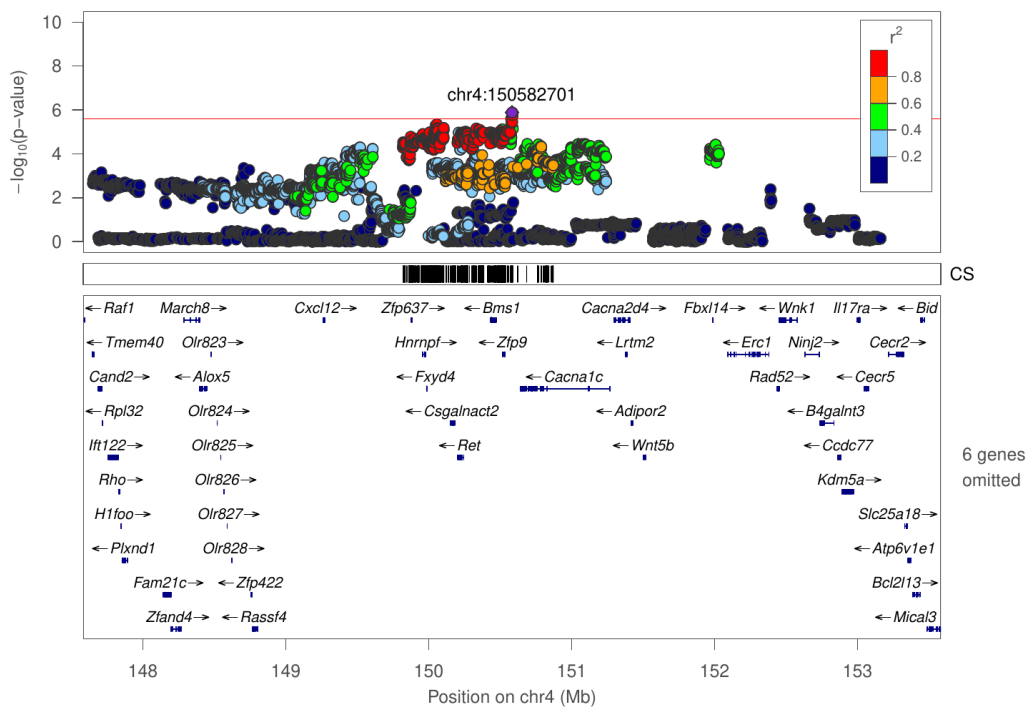

**Figure S45.** Regional association plot for SIT: Mean distance to social zone at chr4:150582701

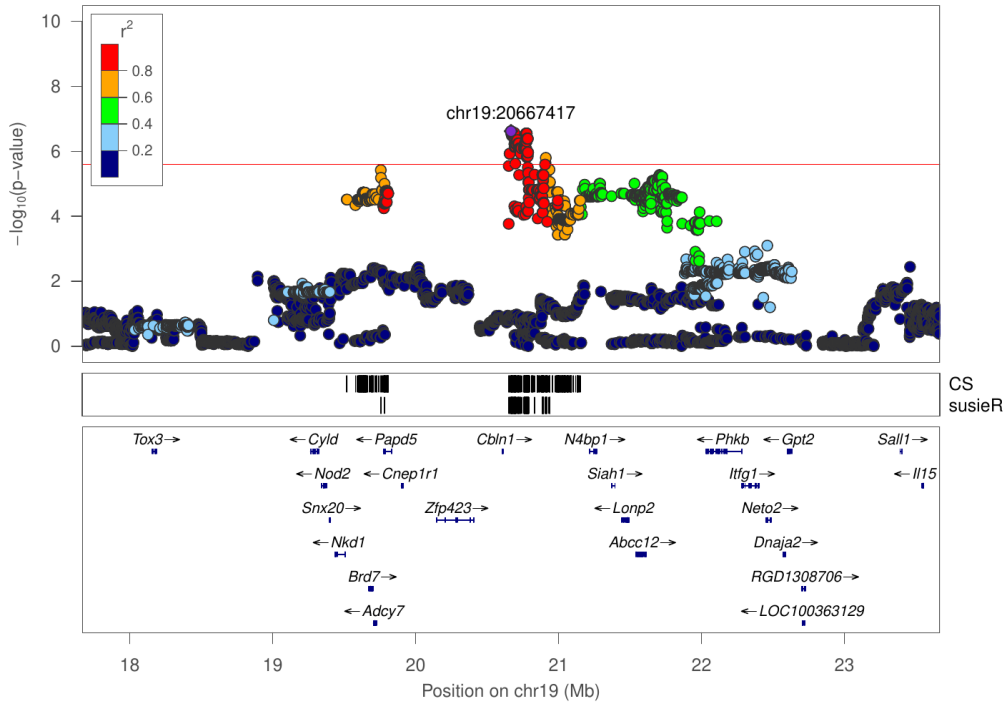

**Figure S46.** Regional association plot for SIT: Total distance to object zone at chr19:20667417

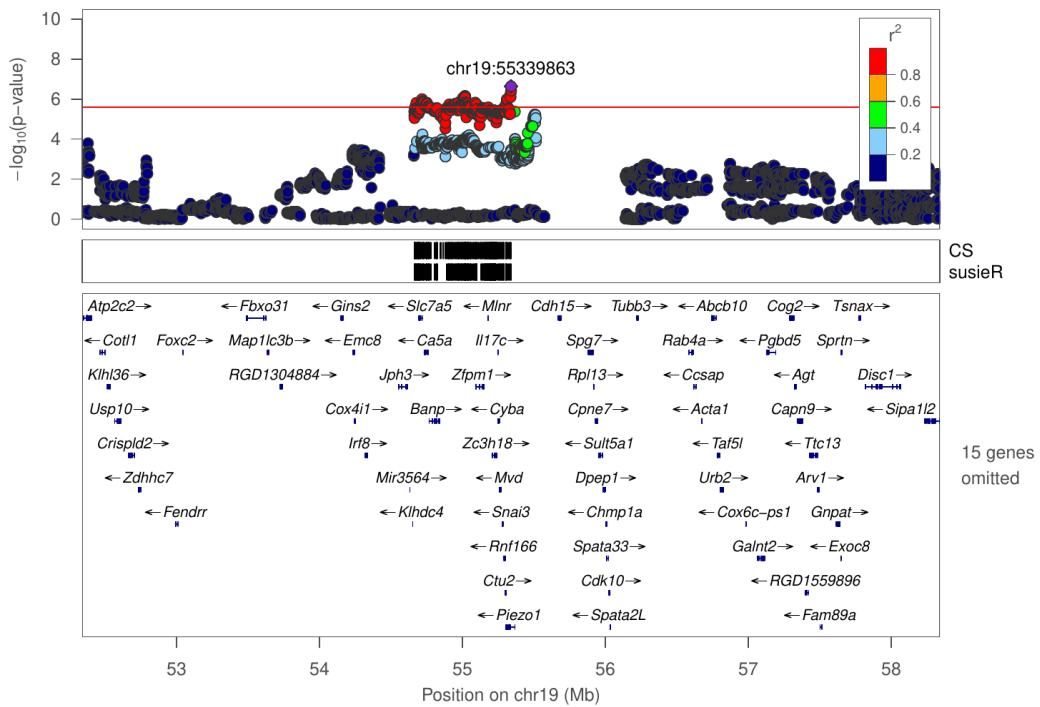

**Figure S47.** Regional association plot for SIT: Total distance to social zone at chr19:55339863

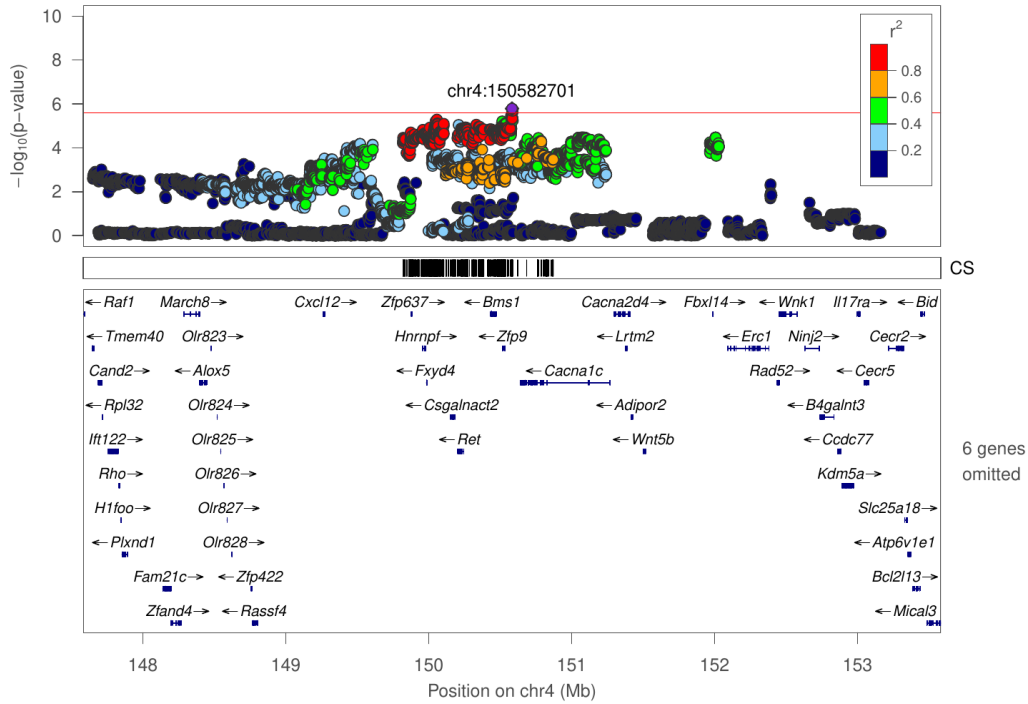

**Figure S48.** Regional association plot for SIT: Total distance to social zone at chr4:150582701

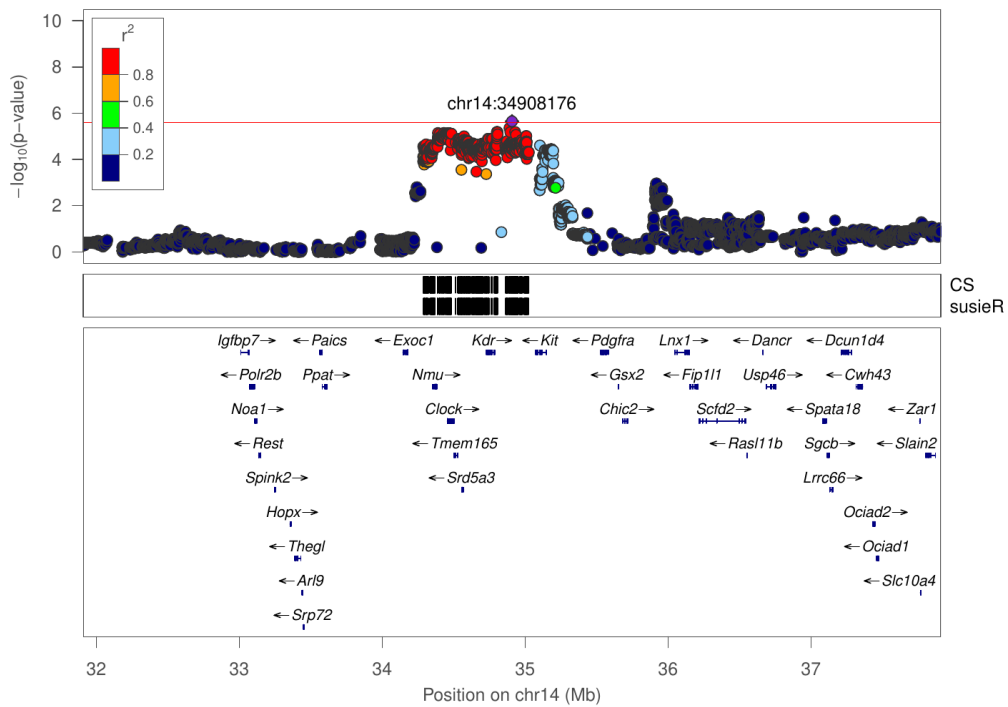

**Figure S49.** Regional association plot for SIT: Total travel distance at chr14:34908176

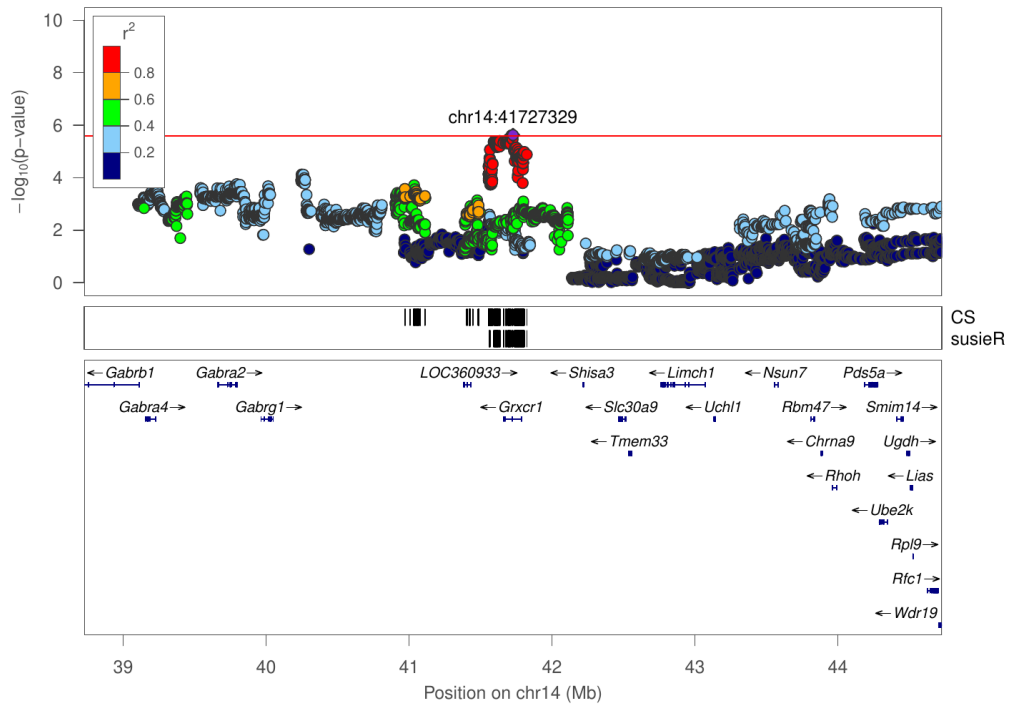

**Figure S50.** Regional association plot for SIT: Total travel distance at chr14:41727329
